# Supplementary material for: Systematic detection of horizontal gene transfer across genera among multidrug-resistant bacteria in a single hospital
Source: eLife. 2020 Apr 14;9:e53886. doi: 10.7554/eLife.53886 (PMC7156236; doi:10.7554/eLife.53886)
Supplement: Supplementary file 1. [file elife-53886-supp1.xlsx]

## Sheet: Sheet1
Supplementary File 1. List of isolates and accession information for Illumina sequence data
Isolate ID	Accession	BioProject	SRA	Genus	Shared sequence cluster
ACIN00148	SAMN10435488	PRJNA475751	SRR8199177	Acinetobacter
ACIN00149	SAMN10435489	PRJNA475751	SRR8199176	Acinetobacter
ACIN00150	SAMN10435490	PRJNA475751	SRR8199175	Acinetobacter
ACIN00151	SAMN10435491	PRJNA475751	SRR8199174	Acinetobacter
ACIN00153	SAMN10435492	PRJNA475751	SRR8199498	Acinetobacter
ACIN00154	SAMN10435493	PRJNA475751	SRR8199496	Acinetobacter
ACIN00156	SAMN10435495	PRJNA475751	SRR8199170	Acinetobacter	X
ACIN00158	SAMN10435497	PRJNA475751	SRR8199068	Acinetobacter
ACIN00159	SAMN10435498	PRJNA475751	SRR8199213	Acinetobacter
ACIN00161	SAMN10435499	PRJNA475751	SRR8199212	Acinetobacter
ACIN00162	SAMN10435500	PRJNA475751	SRR8199215	Acinetobacter
ACIN00163	SAMN10435501	PRJNA475751	SRR8199214	Acinetobacter
ACIN00164	SAMN10435502	PRJNA475751	SRR8199209	Acinetobacter
ACIN00165	SAMN10435503	PRJNA475751	SRR8199208	Acinetobacter
ACIN00166	SAMN10435504	PRJNA475751	SRR8199211	Acinetobacter
ACIN00167	SAMN10435505	PRJNA475751	SRR8199210	Acinetobacter
ACIN00169	SAMN10435506	PRJNA475751	SRR8199217	Acinetobacter
ACIN00170	SAMN10435507	PRJNA475751	SRR8199216	Acinetobacter
ACIN00171	SAMN10435508	PRJNA475751	SRR8199541	Acinetobacter
ACIN00172	SAMN10435509	PRJNA475751	SRR8199542	Acinetobacter
ACIN00173	SAMN10435510	PRJNA475751	SRR8199543	Acinetobacter
ACIN00174	SAMN10435511	PRJNA475751	SRR8199544	Acinetobacter
ACIN00175	SAMN10435512	PRJNA475751	SRR8199545	Acinetobacter
ACIN00176	SAMN10435513	PRJNA475751	SRR8199546	Acinetobacter
ACIN00177	SAMN10435514	PRJNA475751	SRR8199547	Acinetobacter
ACIN00178	SAMN10435515	PRJNA475751	SRR8199548	Acinetobacter
ACIN00179	SAMN10435516	PRJNA475751	SRR8199538	Acinetobacter
ACIN00181	SAMN10435517	PRJNA475751	SRR8199539	Acinetobacter
ACIN00183	SAMN10435518	PRJNA475751	SRR8198929	Acinetobacter
ACIN00184	SAMN10435519	PRJNA475751	SRR8198928	Acinetobacter
ACIN00185	SAMN10435520	PRJNA475751	SRR8198927	Acinetobacter
ACIN00188	SAMN10435521	PRJNA475751	SRR8198926	Acinetobacter
ACIN00189	SAMN10435522	PRJNA475751	SRR8198925	Acinetobacter
ACIN00190	SAMN10435523	PRJNA475751	SRR8198924	Acinetobacter
ACIN00191	SAMN10435524	PRJNA475751	SRR8198923	Acinetobacter
ACIN00192	SAMN10435525	PRJNA475751	SRR8198922	Acinetobacter
ACIN00193	SAMN10435526	PRJNA475751	SRR8198921	Acinetobacter
ACIN00195	SAMN10435527	PRJNA475751	SRR8198920	Acinetobacter
ACIN00196	SAMN10435528	PRJNA475751	SRR8199361	Acinetobacter
ACIN00198	SAMN10435530	PRJNA475751	SRR8198874	Acinetobacter
ACIN00199	SAMN10435531	PRJNA475751	SRR8198875	Acinetobacter
ACIN00200	SAMN10435532	PRJNA475751	SRR8198880	Acinetobacter
ACIN00201	SAMN10435533	PRJNA475751	SRR8198881	Acinetobacter
ACIN00202	SAMN10435534	PRJNA475751	SRR8198878	Acinetobacter
ACIN00203	SAMN10435535	PRJNA475751	SRR8198879	Acinetobacter
ACIN00204	SAMN10435536	PRJNA475751	SRR8198871	Acinetobacter
ACIN00205	SAMN11284912	PRJNA475751	SRR8810245	Acinetobacter
ACIN00206	SAMN11284913	PRJNA475751	SRR8810244	Acinetobacter
ACIN00207	SAMN11284914	PRJNA475751	SRR8810622	Acinetobacter
ACIN00208	SAMN11284915	PRJNA475751	SRR8810578	Acinetobacter
ACIN00210	SAMN11284917	PRJNA475751	SRR8810196	Acinetobacter
ACIN00217	SAMN10435537	PRJNA475751	SRR8198872	Acinetobacter
ACIN00218	SAMN10435538	PRJNA475751	SRR8199281	Acinetobacter
BC00011	SAMN10435539	PRJNA475751	SRR8199280	Burkholderia
BC00012	SAMN10435540	PRJNA475751	SRR8199283	Burkholderia
BC00013	SAMN10435541	PRJNA475751	SRR8199282	Burkholderia
BC00014	SAMN10435542	PRJNA475751	SRR8199285	Burkholderia
BC00015	SAMN10435543	PRJNA475751	SRR8199284	Burkholderia
BC00016	SAMN10435544	PRJNA475751	SRR8199287	Burkholderia
BC00018	SAMN11284918	PRJNA475751	SRR8810169	Burkholderia
CB00001	SAMN10435546	PRJNA475751	SRR8199278	Citrobacter
CB00002	SAMN10435547	PRJNA475751	SRR8199277	Citrobacter
CB00003	SAMN10435548	PRJNA475751	SRR8199651	Citrobacter
CB00004	SAMN10435549	PRJNA475751	SRR8199644	Citrobacter
CB00006	SAMN10435551	PRJNA475751	SRR8199646	Citrobacter
CB00007	SAMN10435552	PRJNA475751	SRR8199639	Citrobacter
CB00008	SAMN10435553	PRJNA475751	SRR8199640	Citrobacter
CB00009	SAMN10435554	PRJNA475751	SRR8199641	Citrobacter
CB00010	SAMN10435555	PRJNA475751	SRR8199642	Citrobacter
CB00011	SAMN10435556	PRJNA475751	SRR8199637	Citrobacter
CB00012	SAMN10435557	PRJNA475751	SRR8199638	Citrobacter	X
CB00013	SAMN10435558	PRJNA475751	SRR8199044	Citrobacter
CB00014	SAMN11284920	PRJNA475751	SRR8810252	Citrobacter	X
CB00016	SAMN10435560	PRJNA475751	SRR8199042	Citrobacter	X
CB00017	SAMN10435561	PRJNA475751	SRR8199041	Citrobacter	X
CB00018	SAMN10435562	PRJNA475751	SRR8199048	Citrobacter
CB00019	SAMN10435563	PRJNA475751	SRR8199047	Citrobacter
CB00020	SAMN10435564	PRJNA475751	SRR8199046	Citrobacter
CB00021	SAMN10435565	PRJNA475751	SRR8199045	Citrobacter
CB00022	SAMN10435566	PRJNA475751	SRR8199050	Citrobacter
CB00023	SAMN10435567	PRJNA475751	SRR8199049	Citrobacter
CB00024	SAMN10435568	PRJNA475751	SRR8198990	Citrobacter
CB00025	SAMN10435569	PRJNA475751	SRR8198991	Citrobacter	X
CB00027	SAMN10435571	PRJNA475751	SRR8199105	Citrobacter
CB00028	SAMN10435572	PRJNA475751	SRR8198953	Citrobacter	X
CB00031	SAMN10435575	PRJNA475751	SRR8198985	Citrobacter
CB00032	SAMN10435576	PRJNA475751	SRR8198900	Citrobacter
CB00033	SAMN10435577	PRJNA475751	SRR8198919	Citrobacter	X
CB00034	SAMN10435578	PRJNA475751	SRR8199388	Citrobacter
CB00035	SAMN10435579	PRJNA475751	SRR8199609	Citrobacter
CB00036	SAMN10435580	PRJNA475751	SRR8199393	Citrobacter
CB00037	SAMN10435581	PRJNA475751	SRR8199390	Citrobacter
CB00038	SAMN10435582	PRJNA475751	SRR8199381	Citrobacter
CB00039	SAMN10435583	PRJNA475751	SRR8199369	Citrobacter	X
CB00040	SAMN10435584	PRJNA475751	SRR8199383	Citrobacter
CB00041	SAMN10435585	PRJNA475751	SRR8199382	Citrobacter
CB00042	SAMN10435586	PRJNA475751	SRR8199245	Citrobacter
CB00043	SAMN10435587	PRJNA475751	SRR8199679	Citrobacter
CB00044	SAMN10435588	PRJNA475751	SRR8199376	Citrobacter
CB00045	SAMN10435589	PRJNA475751	SRR8199377	Citrobacter
CB00046	SAMN10435590	PRJNA475751	SRR8199378	Citrobacter
CB00047	SAMN10435591	PRJNA475751	SRR8199379	Citrobacter
CB00048	SAMN10435592	PRJNA475751	SRR8199372	Citrobacter
CB00049	SAMN10435593	PRJNA475751	SRR8199373	Citrobacter	X
CB00051	SAMN10435594	PRJNA475751	SRR8199374	Citrobacter
CB00052	SAMN10435595	PRJNA475751	SRR8199375	Citrobacter
CB00053	SAMN10435596	PRJNA475751	SRR8199384	Citrobacter
CB00054	SAMN10435597	PRJNA475751	SRR8199385	Citrobacter
CB00055	SAMN10435598	PRJNA475751	SRR8198979	Citrobacter
CB00056	SAMN10435599	PRJNA475751	SRR8198978	Citrobacter
CB00057	SAMN10435600	PRJNA475751	SRR8198977	Citrobacter	X
CB00058	SAMN10435601	PRJNA475751	SRR8198976	Citrobacter
CB00059	SAMN10435602	PRJNA475751	SRR8198983	Citrobacter
CB00060	SAMN10435603	PRJNA475751	SRR8198982	Citrobacter
CB00061	SAMN10435604	PRJNA475751	SRR8198981	Citrobacter	X
CB00062	SAMN10435605	PRJNA475751	SRR8198980	Citrobacter
CB00063	SAMN10435606	PRJNA475751	SRR8198987	Citrobacter	X
CB00064	SAMN10435607	PRJNA475751	SRR8198986	Citrobacter
CB00065	SAMN10435608	PRJNA475751	SRR8199666	Citrobacter
CB00067	SAMN10435609	PRJNA475751	SRR8199667	Citrobacter	X
CB00068	SAMN10435610	PRJNA475751	SRR8199664	Citrobacter
CB00069	SAMN10435611	PRJNA475751	SRR8199665	Citrobacter
CB00070	SAMN10435612	PRJNA475751	SRR8199662	Citrobacter	X
CB00071	SAMN10435613	PRJNA475751	SRR8199663	Citrobacter
CB00072	SAMN10435614	PRJNA475751	SRR8199660	Citrobacter
CB00073	SAMN10435615	PRJNA475751	SRR8199661	Citrobacter	X
CB00074	SAMN10435616	PRJNA475751	SRR8199658	Citrobacter
CB00075	SAMN10435617	PRJNA475751	SRR8199659	Citrobacter
CB00078	SAMN11284921	PRJNA475751	SRR8809980	Citrobacter
CB00079	SAMN11284922	PRJNA475751	SRR8809983	Citrobacter	X
CB00080	SAMN11284923	PRJNA475751	SRR8810437	Citrobacter
CB00081	SAMN11284924	PRJNA475751	SRR8810440	Citrobacter	X
CB00082	SAMN11284925	PRJNA475751	SRR8810435	Citrobacter	X
CB00083	SAMN11284926	PRJNA475751	SRR8810438	Citrobacter	X
CB00084	SAMN11284927	PRJNA475751	SRR8810540	Citrobacter	X
CB00085	SAMN11284928	PRJNA475751	SRR8810436	Citrobacter
CB00086	SAMN11284929	PRJNA475751	SRR8810023	Citrobacter
CB00087	SAMN11284930	PRJNA475751	SRR8810541	Citrobacter
CB00088	SAMN11284931	PRJNA475751	SRR8810017	Citrobacter
CD07742	SAMN09400549	PRJNA475751	SRR7297302	Clostridioides
CD07743	SAMN09400550	PRJNA475751	SRR7297301	Clostridioides
CD07744	SAMN09400551	PRJNA475751	SRR7297300	Clostridioides
CD07745	SAMN09400552	PRJNA475751	SRR7297299	Clostridioides
CD07746	SAMN09400553	PRJNA475751	SRR7297298	Clostridioides
CD07747	SAMN09400554	PRJNA475751	SRR7297297	Clostridioides
CD07748	SAMN09400555	PRJNA475751	SRR7297296	Clostridioides
CD07749	SAMN09400556	PRJNA475751	SRR7297456	Clostridioides
CD07750	SAMN09400557	PRJNA475751	SRR7297248	Clostridioides
CD07751	SAMN09400558	PRJNA475751	SRR7297433	Clostridioides
CD07752	SAMN09400559	PRJNA475751	SRR7297561	Clostridioides
CD07753	SAMN09400560	PRJNA475751	SRR7297560	Clostridioides
CD07754	SAMN09400561	PRJNA475751	SRR7297563	Clostridioides
CD07755	SAMN09400562	PRJNA475751	SRR7297562	Clostridioides
CD07756	SAMN09400563	PRJNA475751	SRR7297557	Clostridioides
CD07757	SAMN09400564	PRJNA475751	SRR7297556	Clostridioides
CD07758	SAMN09400565	PRJNA475751	SRR7297559	Clostridioides
CD07759	SAMN09400566	PRJNA475751	SRR7297558	Clostridioides
CD07762	SAMN09400567	PRJNA475751	SRR7297555	Clostridioides
CD07763	SAMN09400568	PRJNA475751	SRR7297554	Clostridioides
CD07764	SAMN09400569	PRJNA475751	SRR7296942	Clostridioides
CD07765	SAMN09400570	PRJNA475751	SRR7296943	Clostridioides
CD07766	SAMN09400571	PRJNA475751	SRR7296944	Clostridioides
CD07767	SAMN09400572	PRJNA475751	SRR7296945	Clostridioides
CD07769	SAMN09400574	PRJNA475751	SRR7296947	Clostridioides
CD07770	SAMN09400575	PRJNA475751	SRR7296948	Clostridioides
CD07771	SAMN09400576	PRJNA475751	SRR7296949	Clostridioides
CD07773	SAMN09400578	PRJNA475751	SRR7296951	Clostridioides
CD07774	SAMN09400579	PRJNA475751	SRR7297374	Clostridioides
CD07775	SAMN09400580	PRJNA475751	SRR7297336	Clostridioides
CD07780	SAMN09400584	PRJNA475751	SRR7297369	Clostridioides
CD07781	SAMN09400585	PRJNA475751	SRR7297368	Clostridioides
CD07782	SAMN09400586	PRJNA475751	SRR7297367	Clostridioides
CD07783	SAMN09400587	PRJNA475751	SRR7297378	Clostridioides
CD07784	SAMN09400588	PRJNA475751	SRR7297377	Clostridioides
CD07785	SAMN09400589	PRJNA475751	SRR7297350	Clostridioides
CD07786	SAMN09400590	PRJNA475751	SRR7297351	Clostridioides
CD07788	SAMN09400591	PRJNA475751	SRR7297348	Clostridioides
CD07789	SAMN09400592	PRJNA475751	SRR7297349	Clostridioides
CD07790	SAMN09400593	PRJNA475751	SRR7297354	Clostridioides
CD07791	SAMN09400594	PRJNA475751	SRR7297355	Clostridioides
CD07792	SAMN09400595	PRJNA475751	SRR7297352	Clostridioides
CD07793	SAMN09400596	PRJNA475751	SRR7297353	Clostridioides
CD07794	SAMN09400597	PRJNA475751	SRR7297356	Clostridioides
CD07795	SAMN09400598	PRJNA475751	SRR7297357	Clostridioides
CD07796	SAMN09400599	PRJNA475751	SRR7297107	Clostridioides
CD07797	SAMN09400600	PRJNA475751	SRR7297106	Clostridioides
CD07798	SAMN09400601	PRJNA475751	SRR7297109	Clostridioides
CD07799	SAMN09400602	PRJNA475751	SRR7297108	Clostridioides
CD07800	SAMN09400603	PRJNA475751	SRR7297111	Clostridioides
CD07801	SAMN09400604	PRJNA475751	SRR7297110	Clostridioides
CD07802	SAMN09400605	PRJNA475751	SRR7297113	Clostridioides
CD07803	SAMN09400606	PRJNA475751	SRR7297112	Clostridioides
CD07804	SAMN09400607	PRJNA475751	SRR7297115	Clostridioides
CD07805	SAMN09400608	PRJNA475751	SRR7297114	Clostridioides
CD07806	SAMN09400609	PRJNA475751	SRR7297080	Clostridioides
CD07807	SAMN09400610	PRJNA475751	SRR7297081	Clostridioides
CD07808	SAMN09400611	PRJNA475751	SRR7297082	Clostridioides
CD07809	SAMN09400612	PRJNA475751	SRR7297083	Clostridioides
CD07810	SAMN09400613	PRJNA475751	SRR7297076	Clostridioides
CD07811	SAMN09400614	PRJNA475751	SRR7297077	Clostridioides
CD07812	SAMN09400615	PRJNA475751	SRR7297078	Clostridioides	X
CD07813	SAMN09400616	PRJNA475751	SRR7297079	Clostridioides
CD07814	SAMN09400617	PRJNA475751	SRR7297084	Clostridioides	X
CD07815	SAMN09400618	PRJNA475751	SRR7297085	Clostridioides
CD07816	SAMN09400619	PRJNA475751	SRR7296830	Clostridioides
CD07817	SAMN09400620	PRJNA475751	SRR7297095	Clostridioides
CD07818	SAMN09400621	PRJNA475751	SRR7296828	Clostridioides
CD07819	SAMN09400622	PRJNA475751	SRR7296827	Clostridioides
CD07820	SAMN09400623	PRJNA475751	SRR7296834	Clostridioides
CD07821	SAMN09400624	PRJNA475751	SRR7296833	Clostridioides
CD07822	SAMN09400625	PRJNA475751	SRR7296832	Clostridioides
CD07823	SAMN09400626	PRJNA475751	SRR7296831	Clostridioides
CD07824	SAMN09400627	PRJNA475751	SRR7296825	Clostridioides
CD07825	SAMN09400628	PRJNA475751	SRR7296824	Clostridioides
CD07826	SAMN09400629	PRJNA475751	SRR7297550	Clostridioides
CD07827	SAMN09400630	PRJNA475751	SRR7297551	Clostridioides
CD07828	SAMN09400631	PRJNA475751	SRR7297548	Clostridioides
CD07829	SAMN09400632	PRJNA475751	SRR7297549	Clostridioides
CD07830	SAMN09400633	PRJNA475751	SRR7297546	Clostridioides
CD07831	SAMN09400634	PRJNA475751	SRR7297547	Clostridioides
CD07832	SAMN09400635	PRJNA475751	SRR7297544	Clostridioides
CD07833	SAMN09400636	PRJNA475751	SRR7297545	Clostridioides
CD07835	SAMN09400637	PRJNA475751	SRR7297552	Clostridioides
CD07836	SAMN09400638	PRJNA475751	SRR7297553	Clostridioides
CD07837	SAMN09400639	PRJNA475751	SRR7297499	Clostridioides
CD07838	SAMN09400640	PRJNA475751	SRR7296932	Clostridioides
CD07839	SAMN09400641	PRJNA475751	SRR7296935	Clostridioides
CD07840	SAMN09400642	PRJNA475751	SRR7297505	Clostridioides
CD07841	SAMN09400643	PRJNA475751	SRR7296929	Clostridioides
CD07842	SAMN09400644	PRJNA475751	SRR7297478	Clostridioides
CD07843	SAMN09400645	PRJNA475751	SRR7296931	Clostridioides
CD07844	SAMN09400646	PRJNA475751	SRR7296930	Clostridioides
CD07845	SAMN09400647	PRJNA475751	SRR7296937	Clostridioides
CD07846	SAMN09400648	PRJNA475751	SRR7297564	Clostridioides
CD07849	SAMN09400649	PRJNA475751	SRR7296820	Clostridioides
CD07850	SAMN09400650	PRJNA475751	SRR7296821	Clostridioides
CD07851	SAMN09400651	PRJNA475751	SRR7296822	Clostridioides
CD07852	SAMN09400652	PRJNA475751	SRR7296823	Clostridioides
CD07853	SAMN09400653	PRJNA475751	SRR7296816	Clostridioides
CD07854	SAMN09400654	PRJNA475751	SRR7296817	Clostridioides
CD07855	SAMN09400655	PRJNA475751	SRR7296818	Clostridioides
CD07856	SAMN09400656	PRJNA475751	SRR7296819	Clostridioides
CD07857	SAMN09400657	PRJNA475751	SRR7296814	Clostridioides
CD07858	SAMN09400658	PRJNA475751	SRR7296815	Clostridioides
CD07859	SAMN09400659	PRJNA475751	SRR7297071	Clostridioides
CD07860	SAMN09400660	PRJNA475751	SRR7297070	Clostridioides
CD07861	SAMN09400661	PRJNA475751	SRR7297069	Clostridioides
CD07862	SAMN09400662	PRJNA475751	SRR7297068	Clostridioides
CD07863	SAMN09400663	PRJNA475751	SRR7297075	Clostridioides
CD07864	SAMN09400664	PRJNA475751	SRR7297074	Clostridioides
CD07865	SAMN09400665	PRJNA475751	SRR7297073	Clostridioides
CD07866	SAMN09400666	PRJNA475751	SRR7297072	Clostridioides
CD07867	SAMN09400667	PRJNA475751	SRR7297066	Clostridioides
CD07868	SAMN09400668	PRJNA475751	SRR7297065	Clostridioides
CD07869	SAMN09400669	PRJNA475751	SRR7297102	Clostridioides
CD07870	SAMN09400670	PRJNA475751	SRR7297103	Clostridioides
CD07871	SAMN09400671	PRJNA475751	SRR7297100	Clostridioides
CD07872	SAMN09400672	PRJNA475751	SRR7297101	Clostridioides
CD07873	SAMN09400673	PRJNA475751	SRR7297098	Clostridioides
CD07874	SAMN09400674	PRJNA475751	SRR7297099	Clostridioides
CD07875	SAMN09400675	PRJNA475751	SRR7297096	Clostridioides
CD07876	SAMN09400676	PRJNA475751	SRR7297097	Clostridioides
CD07877	SAMN09400677	PRJNA475751	SRR7297375	Clostridioides
CD07878	SAMN09400678	PRJNA475751	SRR7297105	Clostridioides
CD07879	SAMN09400679	PRJNA475751	SRR7297342	Clostridioides
CD07880	SAMN09400680	PRJNA475751	SRR7297341	Clostridioides
CD07881	SAMN09400681	PRJNA475751	SRR7297344	Clostridioides
CD07882	SAMN09400682	PRJNA475751	SRR7297343	Clostridioides
CD07883	SAMN09400683	PRJNA475751	SRR7297338	Clostridioides
CD07884	SAMN09400684	PRJNA475751	SRR7297337	Clostridioides
CD07885	SAMN09400685	PRJNA475751	SRR7297340	Clostridioides
CD07886	SAMN09400686	PRJNA475751	SRR7297339	Clostridioides
CD07887	SAMN09400687	PRJNA475751	SRR7297347	Clostridioides
CD07888	SAMN09400688	PRJNA475751	SRR7297346	Clostridioides
CD07889	SAMN09400689	PRJNA475751	SRR7296910	Clostridioides
CD07890	SAMN09400690	PRJNA475751	SRR7296911	Clostridioides
CD07891	SAMN09400691	PRJNA475751	SRR7296912	Clostridioides	X
CD07896	SAMN09400692	PRJNA475751	SRR7296913	Clostridioides
CD07897	SAMN09400693	PRJNA475751	SRR7296914	Clostridioides
CD07898	SAMN09400694	PRJNA475751	SRR7296915	Clostridioides
CD07902	SAMN09400695	PRJNA475751	SRR7296916	Clostridioides
CD07904	SAMN09400696	PRJNA475751	SRR7296917	Clostridioides
CD07906	SAMN09400697	PRJNA475751	SRR7296918	Clostridioides
CD07907	SAMN09400698	PRJNA475751	SRR7296919	Clostridioides
CD07909	SAMN09400699	PRJNA475751	SRR7297529	Clostridioides
CD07910	SAMN09400700	PRJNA475751	SRR7297528	Clostridioides
CD07911	SAMN09400701	PRJNA475751	SRR7297527	Clostridioides
CD07914	SAMN09400702	PRJNA475751	SRR7297526	Clostridioides
CD07915	SAMN09400703	PRJNA475751	SRR7297525	Clostridioides
CD07916	SAMN09400704	PRJNA475751	SRR7297524	Clostridioides
CD07917	SAMN09400705	PRJNA475751	SRR7297523	Clostridioides
CD07919	SAMN09400707	PRJNA475751	SRR7297521	Clostridioides
CD07920	SAMN09400708	PRJNA475751	SRR7297520	Clostridioides
CD07921	SAMN09400709	PRJNA475751	SRR7297208	Clostridioides
CD07922	SAMN09400710	PRJNA475751	SRR7297209	Clostridioides
CD07923	SAMN09400711	PRJNA475751	SRR7297206	Clostridioides
CD07924	SAMN09400712	PRJNA475751	SRR7297207	Clostridioides
CD07925	SAMN09400713	PRJNA475751	SRR7297212	Clostridioides
CD07926	SAMN09400714	PRJNA475751	SRR7297213	Clostridioides
CD07927	SAMN09400715	PRJNA475751	SRR7297210	Clostridioides
CD07929	SAMN09400716	PRJNA475751	SRR7297211	Clostridioides
CD07930	SAMN09400717	PRJNA475751	SRR7297204	Clostridioides
CD07931	SAMN09400718	PRJNA475751	SRR7297205	Clostridioides
CD07932	SAMN09400719	PRJNA475751	SRR7296788	Clostridioides
CD07933	SAMN09400720	PRJNA475751	SRR7296787	Clostridioides
CD07935	SAMN09400721	PRJNA475751	SRR7296790	Clostridioides
CD07936	SAMN09400722	PRJNA475751	SRR7296789	Clostridioides
CD07937	SAMN09400723	PRJNA475751	SRR7296792	Clostridioides
CD07938	SAMN09400724	PRJNA475751	SRR7296791	Clostridioides
CD07939	SAMN09400725	PRJNA475751	SRR7296794	Clostridioides
CD07942	SAMN09400726	PRJNA475751	SRR7296793	Clostridioides
CD07943	SAMN09400727	PRJNA475751	SRR7296786	Clostridioides
CD07944	SAMN09400728	PRJNA475751	SRR7296785	Clostridioides
CD07945	SAMN09400729	PRJNA475751	SRR7297042	Clostridioides
CD07946	SAMN09400730	PRJNA475751	SRR7297043	Clostridioides
CD07947	SAMN09400731	PRJNA475751	SRR7297044	Clostridioides
CD07948	SAMN09400732	PRJNA475751	SRR7297045	Clostridioides
CD07949	SAMN09400733	PRJNA475751	SRR7297038	Clostridioides
CD07950	SAMN09400734	PRJNA475751	SRR7297039	Clostridioides
CD07951	SAMN09400735	PRJNA475751	SRR7297040	Clostridioides
CD07952	SAMN09400736	PRJNA475751	SRR7297041	Clostridioides
CD07953	SAMN09400737	PRJNA475751	SRR7297047	Clostridioides
CD07954	SAMN09400738	PRJNA475751	SRR7297048	Clostridioides
CD07955	SAMN09400739	PRJNA475751	SRR7297647	Clostridioides
CD07956	SAMN09400740	PRJNA475751	SRR7297646	Clostridioides
CD07957	SAMN09400741	PRJNA475751	SRR7297645	Clostridioides
CD07958	SAMN09400742	PRJNA475751	SRR7297644	Clostridioides
CD07960	SAMN09400743	PRJNA475751	SRR7297651	Clostridioides
CD07961	SAMN09400744	PRJNA475751	SRR7297650	Clostridioides
CD07962	SAMN09400745	PRJNA475751	SRR7297649	Clostridioides
CD07963	SAMN09400746	PRJNA475751	SRR7297648	Clostridioides
CD07964	SAMN09400747	PRJNA475751	SRR7297653	Clostridioides
CD07966	SAMN09400748	PRJNA475751	SRR7297652	Clostridioides
CD07967	SAMN09400749	PRJNA475751	SRR7297441	Clostridioides
CD07968	SAMN09400750	PRJNA475751	SRR7297440	Clostridioides
CD07969	SAMN09400751	PRJNA475751	SRR7297439	Clostridioides
CD07970	SAMN09400752	PRJNA475751	SRR7297438	Clostridioides
CD07971	SAMN09400753	PRJNA475751	SRR7297437	Clostridioides
CD07972	SAMN09400754	PRJNA475751	SRR7297436	Clostridioides
CD07973	SAMN09400755	PRJNA475751	SRR7297435	Clostridioides
CD07975	SAMN09400756	PRJNA475751	SRR7297434	Clostridioides
CD07977	SAMN09400757	PRJNA475751	SRR7297444	Clostridioides
CD07978	SAMN09400758	PRJNA475751	SRR7297443	Clostridioides
CD07979	SAMN09400759	PRJNA475751	SRR7297327	Clostridioides
CD07980	SAMN09400760	PRJNA475751	SRR7297331	Clostridioides
CD07981	SAMN09400761	PRJNA475751	SRR7296848	Clostridioides
CD07982	SAMN09400762	PRJNA475751	SRR7296849	Clostridioides
CD07983	SAMN09400763	PRJNA475751	SRR7296850	Clostridioides
CD07984	SAMN09400764	PRJNA475751	SRR7296851	Clostridioides
CD07985	SAMN09400765	PRJNA475751	SRR7297345	Clostridioides
CD07986	SAMN09400766	PRJNA475751	SRR7296853	Clostridioides
CD07987	SAMN09400767	PRJNA475751	SRR7297292	Clostridioides
CD07988	SAMN09400768	PRJNA475751	SRR7297293	Clostridioides
CD07989	SAMN09400769	PRJNA475751	SRR7297380	Clostridioides
CD07990	SAMN09400770	PRJNA475751	SRR7297379	Clostridioides
CD07991	SAMN09400771	PRJNA475751	SRR7297382	Clostridioides
CD07992	SAMN09400772	PRJNA475751	SRR7297381	Clostridioides
CD07993	SAMN09400773	PRJNA475751	SRR7297384	Clostridioides
CD07994	SAMN09400774	PRJNA475751	SRR7297383	Clostridioides
CD07995	SAMN09400775	PRJNA475751	SRR7297386	Clostridioides
CD07996	SAMN09400776	PRJNA475751	SRR7297385	Clostridioides
CD07997	SAMN09400777	PRJNA475751	SRR7297388	Clostridioides
CD07998	SAMN09400778	PRJNA475751	SRR7297387	Clostridioides
CD07999	SAMN09400779	PRJNA475751	SRR7297127	Clostridioides
CD08000	SAMN09400780	PRJNA475751	SRR7297128	Clostridioides
CD08001	SAMN09400781	PRJNA475751	SRR7297125	Clostridioides
CD08002	SAMN09400782	PRJNA475751	SRR7297126	Clostridioides
CD08003	SAMN09400783	PRJNA475751	SRR7297131	Clostridioides
CD08004	SAMN09400784	PRJNA475751	SRR7297132	Clostridioides
CD08005	SAMN10435618	PRJNA475751	SRR8199302	Clostridioides
CD08006	SAMN10435619	PRJNA475751	SRR8199301	Clostridioides
CD08007	SAMN10435620	PRJNA475751	SRR8199304	Clostridioides
CD08008	SAMN10435621	PRJNA475751	SRR8199303	Clostridioides
CD08009	SAMN10435622	PRJNA475751	SRR8199298	Clostridioides
CD08010	SAMN10435623	PRJNA475751	SRR8199297	Clostridioides
CD08011	SAMN10435624	PRJNA475751	SRR8199300	Clostridioides
CD08012	SAMN10435625	PRJNA475751	SRR8199299	Clostridioides
CD08014	SAMN10435627	PRJNA475751	SRR8199293	Clostridioides
CD08015	SAMN10435628	PRJNA475751	SRR8198891	Clostridioides
CD08016	SAMN10435629	PRJNA475751	SRR8198892	Clostridioides
CD08017	SAMN10435630	PRJNA475751	SRR8198893	Clostridioides
CD08018	SAMN10435631	PRJNA475751	SRR8198894	Clostridioides
CD08019	SAMN10435632	PRJNA475751	SRR8198895	Clostridioides
CD08020	SAMN10435633	PRJNA475751	SRR8198896	Clostridioides
CD08021	SAMN10435634	PRJNA475751	SRR8198897	Clostridioides
CD08022	SAMN10435635	PRJNA475751	SRR8198898	Clostridioides
CD08023	SAMN10435636	PRJNA475751	SRR8198883	Clostridioides
CD08024	SAMN10435637	PRJNA475751	SRR8198884	Clostridioides
CD08025	SAMN10435638	PRJNA475751	SRR8199507	Clostridioides
CD08026	SAMN10435639	PRJNA475751	SRR8199506	Clostridioides	X
CD08027	SAMN10435640	PRJNA475751	SRR8199505	Clostridioides
CD08028	SAMN10435641	PRJNA475751	SRR8199504	Clostridioides
CD08029	SAMN10435642	PRJNA475751	SRR8199503	Clostridioides
CD08030	SAMN10435643	PRJNA475751	SRR8199502	Clostridioides
CD08031	SAMN10435644	PRJNA475751	SRR8199501	Clostridioides
CD08032	SAMN10435645	PRJNA475751	SRR8199500	Clostridioides
CD08033	SAMN10435646	PRJNA475751	SRR8199515	Clostridioides
CD08034	SAMN10435647	PRJNA475751	SRR8199514	Clostridioides
CD08035	SAMN10435648	PRJNA475751	SRR8199164	Clostridioides
CD08036	SAMN10435649	PRJNA475751	SRR8199165	Clostridioides
CD08037	SAMN10435650	PRJNA475751	SRR8199162	Clostridioides
CD08038	SAMN10435651	PRJNA475751	SRR8199163	Clostridioides
CD08039	SAMN10435652	PRJNA475751	SRR8199168	Clostridioides
CD08040	SAMN10435653	PRJNA475751	SRR8199169	Clostridioides
CD08041	SAMN10435654	PRJNA475751	SRR8199166	Clostridioides
CD08042	SAMN10435655	PRJNA475751	SRR8199167	Clostridioides
CD08043	SAMN10435656	PRJNA475751	SRR8199172	Clostridioides
CD08048	SAMN11284932	PRJNA475751	SRR8810039	Clostridioides
CD08049	SAMN11284933	PRJNA475751	SRR8809981	Clostridioides
CD08053	SAMN11284934	PRJNA475751	SRR8809763	Clostridioides
CD08054	SAMN11284935	PRJNA475751	SRR8809762	Clostridioides
CD08055	SAMN11284936	PRJNA475751	SRR8809757	Clostridioides
CD08056	SAMN11284937	PRJNA475751	SRR8809756	Clostridioides
CD08057	SAMN11284938	PRJNA475751	SRR8810496	Clostridioides
CD08058	SAMN11284939	PRJNA475751	SRR8810098	Clostridioides
CD08059	SAMN11284940	PRJNA475751	SRR8810050	Clostridioides
CD08060	SAMN11284941	PRJNA475751	SRR8809786	Clostridioides
CD08061	SAMN11284942	PRJNA475751	SRR8809826	Clostridioides
CD08062	SAMN11284943	PRJNA475751	SRR8810331	Clostridioides
CD08063	SAMN11284944	PRJNA475751	SRR8810330	Clostridioides
CD08064	SAMN11284945	PRJNA475751	SRR8810329	Clostridioides
CD08066	SAMN11284946	PRJNA475751	SRR8810327	Clostridioides
CD08067	SAMN11284947	PRJNA475751	SRR8810326	Clostridioides
CD08068	SAMN11284948	PRJNA475751	SRR8809851	Clostridioides
CD08069	SAMN11284949	PRJNA475751	SRR8810041	Clostridioides
CD08070	SAMN11284950	PRJNA475751	SRR8809896	Clostridioides
CD08071	SAMN11284951	PRJNA475751	SRR8809932	Clostridioides
CD08072	SAMN11284952	PRJNA475751	SRR8809928	Clostridioides
CD08073	SAMN11284953	PRJNA475751	SRR8809752	Clostridioides
CD08074	SAMN11284954	PRJNA475751	SRR8809767	Clostridioides
CD08075	SAMN11284955	PRJNA475751	SRR8809764	Clostridioides
CD08076	SAMN11284956	PRJNA475751	SRR8809962	Clostridioides
CD08077	SAMN11284957	PRJNA475751	SRR8810322	Clostridioides
CD08078	SAMN11284958	PRJNA475751	SRR8810084	Clostridioides
CD08079	SAMN11284959	PRJNA475751	SRR8810310	Clostridioides
CD08080	SAMN11284960	PRJNA475751	SRR8809803	Clostridioides
CD08081	SAMN11284961	PRJNA475751	SRR8809802	Clostridioides
CD08082	SAMN11284962	PRJNA475751	SRR8810075	Clostridioides
CD08083	SAMN11284963	PRJNA475751	SRR8810074	Clostridioides
CD08084	SAMN11284964	PRJNA475751	SRR8810077	Clostridioides
CD08085	SAMN11284965	PRJNA475751	SRR8810076	Clostridioides
CD08086	SAMN11284966	PRJNA475751	SRR8810313	Clostridioides
CD08087	SAMN11284967	PRJNA475751	SRR8810312	Clostridioides	X
CD08088	SAMN11284968	PRJNA475751	SRR8809827	Clostridioides
CD08091	SAMN11284969	PRJNA475751	SRR8810026	Clostridioides
CD08092	SAMN11284970	PRJNA475751	SRR8810428	Clostridioides
CD08093	SAMN11284971	PRJNA475751	SRR8809755	Clostridioides
CD08094	SAMN11284972	PRJNA475751	SRR8810033	Clostridioides
CD08095	SAMN11284973	PRJNA475751	SRR8809990	Clostridioides
CD08096	SAMN11284974	PRJNA475751	SRR8809991	Clostridioides
CD08097	SAMN11284975	PRJNA475751	SRR8809992	Clostridioides
CD08098	SAMN11284976	PRJNA475751	SRR8809806	Clostridioides
CD08102	SAMN11284977	PRJNA475751	SRR8810558	Clostridioides
CD08103	SAMN11284978	PRJNA475751	SRR8810499	Clostridioides
CD08104	SAMN11284979	PRJNA475751	SRR8810368	Clostridioides
CD08105	SAMN11284980	PRJNA475751	SRR8810561	Clostridioides
CD08106	SAMN11284981	PRJNA475751	SRR8809977	Clostridioides
CD08107	SAMN11284982	PRJNA475751	SRR8810367	Clostridioides
CD08108	SAMN10435657	PRJNA475751	SRR8199173	Clostridioides
CD08109	SAMN11284983	PRJNA475751	SRR8810357	Clostridioides
CD08110	SAMN11284984	PRJNA475751	SRR8810095	Clostridioides
CD08112	SAMN11284985	PRJNA475751	SRR8810093	Clostridioides
CD08113	SAMN11284986	PRJNA475751	SRR8810096	Clostridioides
CD08114	SAMN11284987	PRJNA475751	SRR8810091	Clostridioides
CD08115	SAMN11284988	PRJNA475751	SRR8810094	Clostridioides
CD08116	SAMN11284989	PRJNA475751	SRR8809766	Clostridioides
CD08117	SAMN11284990	PRJNA475751	SRR8810092	Clostridioides
CD08118	SAMN11284991	PRJNA475751	SRR8809970	Clostridioides
CD08119	SAMN09400785	PRJNA475751	SRR7297129	Clostridioides
CD08120	SAMN09400786	PRJNA475751	SRR7297130	Clostridioides
CD08121	SAMN09400787	PRJNA475751	SRR7297134	Clostridioides
CD08122	SAMN09400788	PRJNA475751	SRR7297135	Clostridioides
CD08123	SAMN09400789	PRJNA475751	SRR7297004	Clostridioides
CD08124	SAMN09400790	PRJNA475751	SRR7297003	Clostridioides
CD08139	SAMN11284992	PRJNA475751	SRR8810156	Clostridioides
CD08140	SAMN11284993	PRJNA475751	SRR8809873	Clostridioides
CD08141	SAMN11284994	PRJNA475751	SRR8809872	Clostridioides
CD08142	SAMN11284995	PRJNA475751	SRR8809871	Clostridioides
CD08143	SAMN11284996	PRJNA475751	SRR8809870	Clostridioides
CD08144	SAMN10435658	PRJNA475751	SRR8199408	Clostridioides
CD08145	SAMN11284997	PRJNA475751	SRR8810351	Clostridioides
CD08146	SAMN11284998	PRJNA475751	SRR8810350	Clostridioides
CD08147	SAMN10435659	PRJNA475751	SRR8199407	Clostridioides
CD08148	SAMN10435660	PRJNA475751	SRR8199410	Clostridioides
CD08150	SAMN11284999	PRJNA475751	SRR8810528	Clostridioides
CD08151	SAMN11285000	PRJNA475751	SRR8810529	Clostridioides
CD08152	SAMN11285001	PRJNA475751	SRR8810526	Clostridioides
CD08153	SAMN11285002	PRJNA475751	SRR8810527	Clostridioides
CD08154	SAMN10435661	PRJNA475751	SRR8199409	Clostridioides
CD08155	SAMN11285003	PRJNA475751	SRR8810203	Clostridioides
CD08156	SAMN10435662	PRJNA475751	SRR8199412	Clostridioides
CD08157	SAMN11285004	PRJNA475751	SRR8810204	Clostridioides
CD08158	SAMN11285005	PRJNA475751	SRR8810202	Clostridioides
CD08159	SAMN11285006	PRJNA475751	SRR8810201	Clostridioides	X
CD08160	SAMN11285007	PRJNA475751	SRR8810040	Clostridioides
CD08161	SAMN11285008	PRJNA475751	SRR8810037	Clostridioides
CD08162	SAMN11285009	PRJNA475751	SRR8810038	Clostridioides
CD08163	SAMN10435663	PRJNA475751	SRR8199411	Clostridioides
CD08165	SAMN11285010	PRJNA475751	SRR8810035	Clostridioides
CD08166	SAMN11285011	PRJNA475751	SRR8810036	Clostridioides
CD08167	SAMN11285012	PRJNA475751	SRR8809982	Clostridioides
CD08168	SAMN11285013	PRJNA475751	SRR8810043	Clostridioides
CD08169	SAMN11285014	PRJNA475751	SRR8810044	Clostridioides
CD08171	SAMN11285015	PRJNA475751	SRR8809746	Clostridioides
CD08172	SAMN11285016	PRJNA475751	SRR8809815	Clostridioides
CD08173	SAMN10435664	PRJNA475751	SRR8199414	Clostridioides
CD08174	SAMN11285017	PRJNA475751	SRR8809816	Clostridioides
CD08177	SAMN10435665	PRJNA475751	SRR8199413	Clostridioides
CD08179	SAMN10435666	PRJNA475751	SRR8199416	Clostridioides
CD08181	SAMN10435667	PRJNA475751	SRR8199415	Clostridioides
CD08182	SAMN10435668	PRJNA475751	SRR8199585	Clostridioides
CD08183	SAMN10435669	PRJNA475751	SRR8199587	Clostridioides
CD08184	SAMN10435670	PRJNA475751	SRR8199206	Clostridioides
CD08185	SAMN10435671	PRJNA475751	SRR8199207	Clostridioides
CD08186	SAMN10435672	PRJNA475751	SRR8199200	Clostridioides
CD08189	SAMN10435673	PRJNA475751	SRR8199201	Clostridioides
CD08190	SAMN10435674	PRJNA475751	SRR8199202	Clostridioides
EC00587	SAMN09400791	PRJNA475751	SRR7297002	Escherichia
EC00588	SAMN09400792	PRJNA475751	SRR7297001	Escherichia
EC00589	SAMN09400793	PRJNA475751	SRR7297008	Escherichia
EC00590	SAMN09400794	PRJNA475751	SRR7297007	Escherichia
EC00591	SAMN09400795	PRJNA475751	SRR7297006	Escherichia
EC00592	SAMN09400796	PRJNA475751	SRR7297005	Escherichia	X
EC00593	SAMN09400797	PRJNA475751	SRR7297011	Escherichia	X
EC00594	SAMN09400798	PRJNA475751	SRR7297010	Escherichia
EC00595	SAMN09400799	PRJNA475751	SRR7296760	Escherichia	X
EC00596	SAMN09400800	PRJNA475751	SRR7296761	Escherichia
EC00597	SAMN09400801	PRJNA475751	SRR7296762	Escherichia
EC00598	SAMN09400802	PRJNA475751	SRR7296763	Escherichia
EC00599	SAMN09400803	PRJNA475751	SRR7296756	Escherichia	X
EC00600	SAMN09400804	PRJNA475751	SRR7296757	Escherichia	X
EC00601	SAMN09400805	PRJNA475751	SRR7296758	Escherichia	X
EC00602	SAMN09400806	PRJNA475751	SRR7296759	Escherichia	X
EC00603	SAMN09400807	PRJNA475751	SRR7296764	Escherichia
EC00604	SAMN09400808	PRJNA475751	SRR7296765	Escherichia
EC00605	SAMN09400809	PRJNA475751	SRR7297262	Escherichia
EC00606	SAMN09400810	PRJNA475751	SRR7297261	Escherichia	X
EC00607	SAMN09400811	PRJNA475751	SRR7297264	Escherichia
EC00608	SAMN09400812	PRJNA475751	SRR7297263	Escherichia
EC00609	SAMN09400813	PRJNA475751	SRR7297258	Escherichia	X
EC00610	SAMN09400814	PRJNA475751	SRR7297257	Escherichia
EC00611	SAMN09400815	PRJNA475751	SRR7297260	Escherichia
EC00614	SAMN09400816	PRJNA475751	SRR7296928	Escherichia
EC00615	SAMN09400817	PRJNA475751	SRR7297254	Escherichia
EC00616	SAMN09400818	PRJNA475751	SRR7296920	Escherichia
EC00617	SAMN09400819	PRJNA475751	SRR7297606	Escherichia	X
EC00618	SAMN09400820	PRJNA475751	SRR7297607	Escherichia
EC00619	SAMN09400821	PRJNA475751	SRR7297604	Escherichia
EC00620	SAMN09400822	PRJNA475751	SRR7297605	Escherichia	X
EC00621	SAMN09400823	PRJNA475751	SRR7297602	Escherichia
EC00622	SAMN09400824	PRJNA475751	SRR7297603	Escherichia
EC00623	SAMN09400825	PRJNA475751	SRR7297600	Escherichia	X
EC00624	SAMN09400826	PRJNA475751	SRR7297601	Escherichia
EC00625	SAMN09400827	PRJNA475751	SRR7297598	Escherichia
EC00626	SAMN09400828	PRJNA475751	SRR7297373	Escherichia	X
EC00627	SAMN09400829	PRJNA475751	SRR7296906	Escherichia
EC00628	SAMN09400830	PRJNA475751	SRR7296905	Escherichia
EC00629	SAMN09400831	PRJNA475751	SRR7296867	Escherichia
EC00630	SAMN09400832	PRJNA475751	SRR7296864	Escherichia
EC00631	SAMN09400833	PRJNA475751	SRR7296902	Escherichia
EC00632	SAMN09400834	PRJNA475751	SRR7296901	Escherichia
EC00633	SAMN09400835	PRJNA475751	SRR7296900	Escherichia
EC00634	SAMN09400836	PRJNA475751	SRR7296899	Escherichia
EC00635	SAMN09400837	PRJNA475751	SRR7296898	Escherichia
EC00636	SAMN09400838	PRJNA475751	SRR7296897	Escherichia
EC00637	SAMN09400839	PRJNA475751	SRR7297311	Escherichia
EC00639	SAMN09400841	PRJNA475751	SRR7297313	Escherichia
EC00640	SAMN09400842	PRJNA475751	SRR7297314	Escherichia
EC00641	SAMN09400843	PRJNA475751	SRR7297315	Escherichia
EC00642	SAMN09400844	PRJNA475751	SRR7297316	Escherichia
EC00643	SAMN09400845	PRJNA475751	SRR7297317	Escherichia
EC00644	SAMN09400846	PRJNA475751	SRR7297318	Escherichia	X
EC00645	SAMN09400847	PRJNA475751	SRR7297319	Escherichia	X
EC00647	SAMN09400848	PRJNA475751	SRR7297320	Escherichia	X
EC00648	SAMN09400849	PRJNA475751	SRR7297176	Escherichia	X
EC00649	SAMN09400850	PRJNA475751	SRR7297177	Escherichia
EC00650	SAMN09400851	PRJNA475751	SRR7297174	Escherichia	X
EC00651	SAMN09400852	PRJNA475751	SRR7297175	Escherichia
EC00652	SAMN09400853	PRJNA475751	SRR7297172	Escherichia
EC00653	SAMN09400854	PRJNA475751	SRR7297173	Escherichia
EC00655	SAMN09400855	PRJNA475751	SRR7297170	Escherichia
EC00656	SAMN09400856	PRJNA475751	SRR7297171	Escherichia	X
EC00657	SAMN09400857	PRJNA475751	SRR7297168	Escherichia
EC00658	SAMN09400858	PRJNA475751	SRR7297169	Escherichia
EC00659	SAMN09400859	PRJNA475751	SRR7296753	Escherichia	X
EC00660	SAMN09400860	PRJNA475751	SRR7296752	Escherichia
EC00661	SAMN09400861	PRJNA475751	SRR7296755	Escherichia	X
EC00662	SAMN09400862	PRJNA475751	SRR7296754	Escherichia
EC00663	SAMN09400863	PRJNA475751	SRR7297421	Escherichia
EC00664	SAMN09400864	PRJNA475751	SRR7297420	Escherichia
EC00666	SAMN09400865	PRJNA475751	SRR7297423	Escherichia
EC00667	SAMN09400866	PRJNA475751	SRR7297422	Escherichia
EC00668	SAMN09400867	PRJNA475751	SRR7297419	Escherichia	X
EC00669	SAMN09400868	PRJNA475751	SRR7297418	Escherichia
EC00670	SAMN09400869	PRJNA475751	SRR7296895	Escherichia
EC00671	SAMN09400870	PRJNA475751	SRR7296896	Escherichia
EC00672	SAMN09400871	PRJNA475751	SRR7297104	Escherichia
EC00673	SAMN09400872	PRJNA475751	SRR7296852	Escherichia	X
EC00674	SAMN09400873	PRJNA475751	SRR7296891	Escherichia
EC00675	SAMN09400874	PRJNA475751	SRR7296892	Escherichia
EC00676	SAMN09400875	PRJNA475751	SRR7296893	Escherichia
EC00677	SAMN09400876	PRJNA475751	SRR7296894	Escherichia
EC00678	SAMN09400877	PRJNA475751	SRR7296903	Escherichia	X
EC00680	SAMN09400878	PRJNA475751	SRR7296904	Escherichia
EC00681	SAMN09400879	PRJNA475751	SRR7297490	Escherichia
EC00682	SAMN09400880	PRJNA475751	SRR7297489	Escherichia
EC00683	SAMN10435675	PRJNA475751	SRR8199203	Escherichia
EC00684	SAMN10435676	PRJNA475751	SRR8199574	Escherichia
EC00685	SAMN10435677	PRJNA475751	SRR8199576	Escherichia	X
EC00686	SAMN10435678	PRJNA475751	SRR8198771	Escherichia
EC00687	SAMN10435679	PRJNA475751	SRR8198770	Escherichia
EC00688	SAMN10435680	PRJNA475751	SRR8198769	Escherichia	X
EC00689	SAMN10435681	PRJNA475751	SRR8198768	Escherichia
EC00690	SAMN10435682	PRJNA475751	SRR8198775	Escherichia	X
EC00691	SAMN10435683	PRJNA475751	SRR8198774	Escherichia
EC00692	SAMN10435684	PRJNA475751	SRR8198773	Escherichia
EC00693	SAMN10435685	PRJNA475751	SRR8198772	Escherichia
EC00694	SAMN10435686	PRJNA475751	SRR8198933	Escherichia
EC00695	SAMN10435687	PRJNA475751	SRR8199434	Escherichia
EC00696	SAMN10435688	PRJNA475751	SRR8199038	Escherichia
EC00697	SAMN10435689	PRJNA475751	SRR8199037	Escherichia
EC00698	SAMN10435690	PRJNA475751	SRR8199036	Escherichia
EC00699	SAMN11285018	PRJNA475751	SRR8810315	Escherichia	X
EC00700	SAMN11285019	PRJNA475751	SRR8810238	Escherichia
EC00701	SAMN11285020	PRJNA475751	SRR8810241	Escherichia	X
EC00702	SAMN11285021	PRJNA475751	SRR8810240	Escherichia
EC00703	SAMN11285022	PRJNA475751	SRR8810184	Escherichia	X
EC00704	SAMN11285023	PRJNA475751	SRR8810461	Escherichia	X
EC00709	SAMN11285024	PRJNA475751	SRR8810102	Escherichia	X
EC00710	SAMN11285025	PRJNA475751	SRR8810029	Escherichia
EC00711	SAMN11285026	PRJNA475751	SRR8810488	Escherichia
EC00712	SAMN11285027	PRJNA475751	SRR8810581	Escherichia
EC00713	SAMN11285028	PRJNA475751	SRR8809808	Escherichia	X
EC00714	SAMN11285029	PRJNA475751	SRR8810031	Escherichia
EC00715	SAMN11285030	PRJNA475751	SRR8810285	Escherichia
KLO00001	SAMN09400881	PRJNA475751	SRR7297488	Klebsiella
KLO00002	SAMN09400882	PRJNA475751	SRR7297487	Klebsiella	X
KLO00003	SAMN09400883	PRJNA475751	SRR7297494	Klebsiella	X
KLO00005	SAMN09400884	PRJNA475751	SRR7297493	Klebsiella
KLO00006	SAMN09400885	PRJNA475751	SRR7297492	Klebsiella
KLO00007	SAMN09400886	PRJNA475751	SRR7297491	Klebsiella
KLO00010	SAMN09400888	PRJNA475751	SRR7297495	Klebsiella	X
KLO00013	SAMN09400891	PRJNA475751	SRR7297249	Klebsiella	X
KLO00014	SAMN09400892	PRJNA475751	SRR7297250	Klebsiella
KLO00015	SAMN10435691	PRJNA475751	SRR8199035	Klebsiella	X
KLO00017	SAMN10435693	PRJNA475751	SRR8199033	Klebsiella	X
KLO00018	SAMN10435694	PRJNA475751	SRR8199032	Klebsiella	X
KLO00023	SAMN11285033	PRJNA475751	SRR8810195	Klebsiella	X
KLO00024	SAMN11285034	PRJNA475751	SRR8810197	Klebsiella
KLP00149	SAMN10435695	PRJNA475751	SRR8199031	Klebsiella	X
KLP00150	SAMN10435696	PRJNA475751	SRR8199030	Klebsiella
KLP00155	SAMN10435697	PRJNA475751	SRR8199029	Klebsiella	X
KLP00156	SAMN10435698	PRJNA475751	SRR8199432	Klebsiella	X
KLP00157	SAMN10435699	PRJNA475751	SRR8199433	Klebsiella	X
KLP00158	SAMN10435700	PRJNA475751	SRR8198930	Klebsiella	X
KLP00159	SAMN10435701	PRJNA475751	SRR8199435	Klebsiella	X
KLP00160	SAMN10435702	PRJNA475751	SRR8199436	Klebsiella
KLP00161	SAMN10435703	PRJNA475751	SRR8198765	Klebsiella	X
KLP00162	SAMN10435704	PRJNA475751	SRR8198766	Klebsiella	X
KLP00163	SAMN10435705	PRJNA475751	SRR8198767	Klebsiella
KLP00164	SAMN10435706	PRJNA475751	SRR8198946	Klebsiella	X
KLP00165	SAMN10435707	PRJNA475751	SRR8198949	Klebsiella
KLP00166	SAMN10435708	PRJNA475751	SRR8199270	Klebsiella	X
KLP00167	SAMN10435709	PRJNA475751	SRR8199269	Klebsiella	X
KLP00168	SAMN10435710	PRJNA475751	SRR8199272	Klebsiella	X
KLP00170	SAMN10435711	PRJNA475751	SRR8199271	Klebsiella	X
KLP00171	SAMN10435712	PRJNA475751	SRR8199274	Klebsiella
KLP00172	SAMN10435713	PRJNA475751	SRR8199273	Klebsiella	X
KLP00173	SAMN10435714	PRJNA475751	SRR8199276	Klebsiella
KLP00174	SAMN10435715	PRJNA475751	SRR8199275	Klebsiella	X
KLP00175	SAMN10435716	PRJNA475751	SRR8199262	Klebsiella	X
KLP00176	SAMN10435717	PRJNA475751	SRR8199261	Klebsiella
KLP00177	SAMN10435718	PRJNA475751	SRR8199631	Klebsiella	X
KLP00178	SAMN10435719	PRJNA475751	SRR8199632	Klebsiella	X
KLP00179	SAMN10435720	PRJNA475751	SRR8199629	Klebsiella
KLP00180	SAMN10435721	PRJNA475751	SRR8199630	Klebsiella	X
KLP00181	SAMN10435722	PRJNA475751	SRR8199635	Klebsiella	X
KLP00182	SAMN10435723	PRJNA475751	SRR8199636	Klebsiella	X
KLP00183	SAMN10435724	PRJNA475751	SRR8199633	Klebsiella	X
KLP00184	SAMN10435725	PRJNA475751	SRR8199634	Klebsiella	X
KLP00185	SAMN10435726	PRJNA475751	SRR8199623	Klebsiella	X
KLP00186	SAMN10435727	PRJNA475751	SRR8199624	Klebsiella
KLP00187	SAMN10435728	PRJNA475751	SRR8198914	Klebsiella	X
KLP00188	SAMN10435729	PRJNA475751	SRR8198913	Klebsiella	X
KLP00190	SAMN10435730	PRJNA475751	SRR8198912	Klebsiella	X
KLP00191	SAMN10435731	PRJNA475751	SRR8198873	Klebsiella	X
KLP00192	SAMN10435732	PRJNA475751	SRR8198918	Klebsiella	X
KLP00193	SAMN10435733	PRJNA475751	SRR8198917	Klebsiella	X
KLP00194	SAMN10435734	PRJNA475751	SRR8198916	Klebsiella	X
KLP00195	SAMN10435735	PRJNA475751	SRR8198915	Klebsiella	X
KLP00196	SAMN10435736	PRJNA475751	SRR8198856	Klebsiella	X
KLP00197	SAMN10435737	PRJNA475751	SRR8198850	Klebsiella
KLP00198	SAMN10435738	PRJNA475751	SRR8199418	Klebsiella	X
KLP00199	SAMN10435739	PRJNA475751	SRR8199550	Klebsiella	X
KLP00200	SAMN10435740	PRJNA475751	SRR8199319	Klebsiella	X
KLP00201	SAMN10435741	PRJNA475751	SRR8199320	Klebsiella	X
KLP00202	SAMN10435742	PRJNA475751	SRR8199313	Klebsiella	X
KLP00203	SAMN10435743	PRJNA475751	SRR8199314	Klebsiella	X
KLP00204	SAMN10435744	PRJNA475751	SRR8199315	Klebsiella	X
KLP00205	SAMN10435745	PRJNA475751	SRR8199316	Klebsiella	X
KLP00206	SAMN10435746	PRJNA475751	SRR8199305	Klebsiella
KLP00207	SAMN10435747	PRJNA475751	SRR8199516	Klebsiella	X
KLP00208	SAMN10435748	PRJNA475751	SRR8199197	Klebsiella	X
KLP00209	SAMN10435749	PRJNA475751	SRR8199196	Klebsiella	X
KLP00210	SAMN10435750	PRJNA475751	SRR8199199	Klebsiella	X
KLP00211	SAMN10435751	PRJNA475751	SRR8199198	Klebsiella	X
KLP00213	SAMN10435753	PRJNA475751	SRR8199192	Klebsiella	X
KLP00214	SAMN10435754	PRJNA475751	SRR8199195	Klebsiella
KLP00215	SAMN10435755	PRJNA475751	SRR8199194	Klebsiella	X
KLP00216	SAMN10435756	PRJNA475751	SRR8199205	Klebsiella	X
KLP00217	SAMN10435757	PRJNA475751	SRR8199204	Klebsiella	X
KLP00218	SAMN10435758	PRJNA475751	SRR8199533	Klebsiella	X
KLP00220	SAMN10435759	PRJNA475751	SRR8199534	Klebsiella	X
KLP00221	SAMN10435760	PRJNA475751	SRR8199531	Klebsiella	X
KLP00222	SAMN10435761	PRJNA475751	SRR8199532	Klebsiella	X
KLP00223	SAMN10435762	PRJNA475751	SRR8199529	Klebsiella
KLP00224	SAMN10435763	PRJNA475751	SRR8199530	Klebsiella	X
KLP00225	SAMN10435764	PRJNA475751	SRR8199527	Klebsiella	X
KLP00226	SAMN10435765	PRJNA475751	SRR8199528	Klebsiella	X
KLP00227	SAMN10435766	PRJNA475751	SRR8199536	Klebsiella	X
KLP00228	SAMN10435767	PRJNA475751	SRR8199537	Klebsiella	X
KLP00229	SAMN10435768	PRJNA475751	SRR8199104	Klebsiella	X
KLP00230	SAMN10435769	PRJNA475751	SRR8199712	Klebsiella	X
KLP00232	SAMN10435771	PRJNA475751	SRR8199656	Klebsiella	X
KLP00233	SAMN11285035	PRJNA475751	SRR8809924	Klebsiella
KLP00234	SAMN11285036	PRJNA475751	SRR8810429	Klebsiella
KLP00235	SAMN11285037	PRJNA475751	SRR8810423	Klebsiella	X
KLP00236	SAMN11285038	PRJNA475751	SRR8810231	Klebsiella	X
KLP00237	SAMN11285039	PRJNA475751	SRR8809929	Klebsiella
KLP00239	SAMN11285040	PRJNA475751	SRR8810328	Klebsiella
KLP00240	SAMN11285041	PRJNA475751	SRR8810150	Klebsiella	X
MRSA10063	SAMN09400893	PRJNA475751	SRR7297255	Staphylococcus
MRSA10064	SAMN09400894	PRJNA475751	SRR7297256	Staphylococcus
MRSA10065	SAMN09400895	PRJNA475751	SRR7297253	Staphylococcus
MRSA10068	SAMN09400896	PRJNA475751	SRR7296921	Staphylococcus
MRSA10069	SAMN09400897	PRJNA475751	SRR7297259	Staphylococcus
MRSA10070	SAMN09400898	PRJNA475751	SRR7296934	Staphylococcus
MRSA10071	SAMN09400899	PRJNA475751	SRR7296839	Staphylococcus
MRSA10072	SAMN09400900	PRJNA475751	SRR7296838	Staphylococcus
MRSA10073	SAMN09400901	PRJNA475751	SRR7296841	Staphylococcus
MRSA10075	SAMN09400902	PRJNA475751	SRR7296840	Staphylococcus
MRSA10076	SAMN09400903	PRJNA475751	SRR7296843	Staphylococcus
MRSA10077	SAMN09400904	PRJNA475751	SRR7296842	Staphylococcus
MRSA10078	SAMN09400905	PRJNA475751	SRR7296845	Staphylococcus
MRSA10079	SAMN09400906	PRJNA475751	SRR7296844	Staphylococcus
MRSA10080	SAMN09400907	PRJNA475751	SRR7296847	Staphylococcus
MRSA10081	SAMN09400908	PRJNA475751	SRR7296846	Staphylococcus
MRSA10082	SAMN09400909	PRJNA475751	SRR7296993	Staphylococcus
MRSA10083	SAMN09400910	PRJNA475751	SRR7296994	Staphylococcus
MRSA10084	SAMN09400911	PRJNA475751	SRR7296995	Staphylococcus
MRSA10086	SAMN09400912	PRJNA475751	SRR7296996	Staphylococcus
MRSA10087	SAMN09400913	PRJNA475751	SRR7296997	Staphylococcus
MRSA10088	SAMN09400914	PRJNA475751	SRR7296998	Staphylococcus
MRSA10089	SAMN09400915	PRJNA475751	SRR7296999	Staphylococcus
MRSA10090	SAMN09400916	PRJNA475751	SRR7297000	Staphylococcus
MRSA10091	SAMN09400917	PRJNA475751	SRR7296991	Staphylococcus
MRSA10092	SAMN09400918	PRJNA475751	SRR7296992	Staphylococcus
MRSA10093	SAMN09400919	PRJNA475751	SRR7297599	Staphylococcus
MRSA10094	SAMN09400920	PRJNA475751	SRR7297303	Staphylococcus
MRSA10095	SAMN09400921	PRJNA475751	SRR7297597	Staphylococcus
MRSA10096	SAMN09400922	PRJNA475751	SRR7297596	Staphylococcus
MRSA10097	SAMN09400923	PRJNA475751	SRR7297595	Staphylococcus
MRSA10098	SAMN09400924	PRJNA475751	SRR7297594	Staphylococcus
MRSA10100	SAMN09400925	PRJNA475751	SRR7297593	Staphylococcus
MRSA10102	SAMN09400926	PRJNA475751	SRR7297592	Staphylococcus
MRSA10103	SAMN09400927	PRJNA475751	SRR7297579	Staphylococcus
MRSA10104	SAMN09400928	PRJNA475751	SRR7297578	Staphylococcus
MRSA10105	SAMN09400929	PRJNA475751	SRR7297540	Staphylococcus
MRSA10106	SAMN09400930	PRJNA475751	SRR7297541	Staphylococcus
MRSA10107	SAMN09400931	PRJNA475751	SRR7297538	Staphylococcus
MRSA10108	SAMN09400932	PRJNA475751	SRR7297539	Staphylococcus
MRSA10109	SAMN09400933	PRJNA475751	SRR7297536	Staphylococcus
MRSA10110	SAMN09400934	PRJNA475751	SRR7297537	Staphylococcus
MRSA10111	SAMN09400935	PRJNA475751	SRR7297534	Staphylococcus
MRSA10112	SAMN09400936	PRJNA475751	SRR7297535	Staphylococcus
MRSA10113	SAMN09400937	PRJNA475751	SRR7297542	Staphylococcus
MRSA10114	SAMN09400938	PRJNA475751	SRR7297543	Staphylococcus
MRSA10115	SAMN09400939	PRJNA475751	SRR7297229	Staphylococcus
MRSA10116	SAMN09400940	PRJNA475751	SRR7297228	Staphylococcus
MRSA10117	SAMN09400941	PRJNA475751	SRR7297231	Staphylococcus
MRSA10118	SAMN09400942	PRJNA475751	SRR7297230	Staphylococcus
MRSA10119	SAMN09400943	PRJNA475751	SRR7297225	Staphylococcus
MRSA10120	SAMN09400944	PRJNA475751	SRR7297224	Staphylococcus
MRSA10121	SAMN09400945	PRJNA475751	SRR7297227	Staphylococcus
MRSA10123	SAMN09400947	PRJNA475751	SRR7297233	Staphylococcus
MRSA10125	SAMN09400948	PRJNA475751	SRR7297232	Staphylococcus
MRSA10126	SAMN09400949	PRJNA475751	SRR7297583	Staphylococcus
MRSA10127	SAMN09400950	PRJNA475751	SRR7297582	Staphylococcus
MRSA10128	SAMN09400951	PRJNA475751	SRR7297585	Staphylococcus
MRSA10130	SAMN09400952	PRJNA475751	SRR7297584	Staphylococcus
MRSA10131	SAMN09400953	PRJNA475751	SRR7297587	Staphylococcus
MRSA10132	SAMN09400954	PRJNA475751	SRR7297586	Staphylococcus
MRSA10133	SAMN09400955	PRJNA475751	SRR7297589	Staphylococcus
MRSA10134	SAMN09400956	PRJNA475751	SRR7297588	Staphylococcus
MRSA10135	SAMN09400957	PRJNA475751	SRR7297591	Staphylococcus
MRSA10136	SAMN09400958	PRJNA475751	SRR7297590	Staphylococcus
MRSA10138	SAMN09400959	PRJNA475751	SRR7296981	Staphylococcus
MRSA10139	SAMN09400960	PRJNA475751	SRR7296982	Staphylococcus
MRSA10140	SAMN09400961	PRJNA475751	SRR7296979	Staphylococcus
MRSA10141	SAMN09400962	PRJNA475751	SRR7296980	Staphylococcus
MRSA10142	SAMN09400963	PRJNA475751	SRR7296985	Staphylococcus
MRSA10143	SAMN09400964	PRJNA475751	SRR7296986	Staphylococcus
MRSA10145	SAMN09400965	PRJNA475751	SRR7296983	Staphylococcus
MRSA10146	SAMN09400966	PRJNA475751	SRR7296984	Staphylococcus
MRSA10147	SAMN09400967	PRJNA475751	SRR7296988	Staphylococcus
MRSA10148	SAMN09400968	PRJNA475751	SRR7296989	Staphylococcus
MRSA10149	SAMN09400969	PRJNA475751	SRR7297413	Staphylococcus
MRSA10150	SAMN09400970	PRJNA475751	SRR7297412	Staphylococcus
MRSA10151	SAMN09400971	PRJNA475751	SRR7297411	Staphylococcus
MRSA10152	SAMN09400972	PRJNA475751	SRR7297410	Staphylococcus
MRSA10153	SAMN09400973	PRJNA475751	SRR7297409	Staphylococcus
MRSA10154	SAMN09400974	PRJNA475751	SRR7297408	Staphylococcus
MRSA10155	SAMN09400975	PRJNA475751	SRR7297407	Staphylococcus
MRSA10156	SAMN09400976	PRJNA475751	SRR7297406	Staphylococcus
MRSA10157	SAMN09400977	PRJNA475751	SRR7297417	Staphylococcus
MRSA10158	SAMN09400978	PRJNA475751	SRR7297416	Staphylococcus
MRSA10159	SAMN09400979	PRJNA475751	SRR7297157	Staphylococcus
MRSA10161	SAMN09400980	PRJNA475751	SRR7297158	Staphylococcus
MRSA10162	SAMN09400981	PRJNA475751	SRR7297159	Staphylococcus
MRSA10163	SAMN09400982	PRJNA475751	SRR7297160	Staphylococcus
MRSA10164	SAMN09400983	PRJNA475751	SRR7297161	Staphylococcus
MRSA10165	SAMN09400984	PRJNA475751	SRR7297162	Staphylococcus
MRSA10166	SAMN09400985	PRJNA475751	SRR7297163	Staphylococcus
MRSA10167	SAMN09400986	PRJNA475751	SRR7297164	Staphylococcus
MRSA10168	SAMN09400987	PRJNA475751	SRR7297149	Staphylococcus
MRSA10169	SAMN09400988	PRJNA475751	SRR7297150	Staphylococcus
MRSA10171	SAMN09400989	PRJNA475751	SRR7297473	Staphylococcus
MRSA10172	SAMN09400990	PRJNA475751	SRR7297472	Staphylococcus
MRSA10173	SAMN09400991	PRJNA475751	SRR7297475	Staphylococcus
MRSA10175	SAMN09400992	PRJNA475751	SRR7297474	Staphylococcus
MRSA10176	SAMN09400993	PRJNA475751	SRR7297469	Staphylococcus
MRSA10178	SAMN09400994	PRJNA475751	SRR7297468	Staphylococcus
MRSA10179	SAMN09400995	PRJNA475751	SRR7297471	Staphylococcus
MRSA10180	SAMN09400996	PRJNA475751	SRR7297470	Staphylococcus
MRSA10182	SAMN09400997	PRJNA475751	SRR7297465	Staphylococcus
MRSA10183	SAMN09400998	PRJNA475751	SRR7297464	Staphylococcus
MRSA10184	SAMN09400999	PRJNA475751	SRR7296879	Staphylococcus
MRSA10185	SAMN09401000	PRJNA475751	SRR7296880	Staphylococcus
MRSA10186	SAMN09401001	PRJNA475751	SRR7296877	Staphylococcus
MRSA10187	SAMN09401002	PRJNA475751	SRR7296878	Staphylococcus
MRSA10188	SAMN09401003	PRJNA475751	SRR7296875	Staphylococcus
MRSA10189	SAMN09401004	PRJNA475751	SRR7296876	Staphylococcus
MRSA10190	SAMN09401005	PRJNA475751	SRR7296873	Staphylococcus
MRSA10191	SAMN09401006	PRJNA475751	SRR7296874	Staphylococcus
MRSA10192	SAMN09401007	PRJNA475751	SRR7296871	Staphylococcus
MRSA10193	SAMN09401008	PRJNA475751	SRR7296872	Staphylococcus
MRSA10194	SAMN09401009	PRJNA475751	SRR7297240	Staphylococcus
MRSA10195	SAMN09401010	PRJNA475751	SRR7297239	Staphylococcus
MRSA10196	SAMN09401011	PRJNA475751	SRR7297238	Staphylococcus
MRSA10197	SAMN09401012	PRJNA475751	SRR7297237	Staphylococcus
MRSA10198	SAMN09401013	PRJNA475751	SRR7297244	Staphylococcus
MRSA10199	SAMN09401014	PRJNA475751	SRR7297243	Staphylococcus
MRSA10200	SAMN09401015	PRJNA475751	SRR7297242	Staphylococcus
MRSA10201	SAMN09401016	PRJNA475751	SRR7297241	Staphylococcus
MRSA10202	SAMN09401017	PRJNA475751	SRR7297246	Staphylococcus
MRSA10203	SAMN09401018	PRJNA475751	SRR7297245	Staphylococcus
MRSA10204	SAMN09401019	PRJNA475751	SRR7297570	Staphylococcus
MRSA10205	SAMN09401020	PRJNA475751	SRR7297571	Staphylococcus
MRSA10206	SAMN09401021	PRJNA475751	SRR7297572	Staphylococcus
MRSA10207	SAMN09401022	PRJNA475751	SRR7297573	Staphylococcus
MRSA10208	SAMN09401023	PRJNA475751	SRR7297566	Staphylococcus
MRSA10209	SAMN09401024	PRJNA475751	SRR7297567	Staphylococcus
MRSA10210	SAMN09401025	PRJNA475751	SRR7297568	Staphylococcus
MRSA10211	SAMN09401026	PRJNA475751	SRR7297569	Staphylococcus
MRSA10212	SAMN09401027	PRJNA475751	SRR7297574	Staphylococcus
MRSA10213	SAMN09401028	PRJNA475751	SRR7297575	Staphylococcus
MRSA10214	SAMN09401029	PRJNA475751	SRR7296956	Staphylococcus
MRSA10215	SAMN09401030	PRJNA475751	SRR7296955	Staphylococcus
MRSA10216	SAMN09401031	PRJNA475751	SRR7296958	Staphylococcus
MRSA10217	SAMN09401032	PRJNA475751	SRR7296957	Staphylococcus
MRSA10218	SAMN09401033	PRJNA475751	SRR7296960	Staphylococcus
MRSA10219	SAMN09401034	PRJNA475751	SRR7296959	Staphylococcus
MRSA10220	SAMN09401035	PRJNA475751	SRR7296962	Staphylococcus
MRSA10223	SAMN09401036	PRJNA475751	SRR7296961	Staphylococcus
MRSA10224	SAMN09401037	PRJNA475751	SRR7296953	Staphylococcus
MRSA10225	SAMN09401038	PRJNA475751	SRR7296952	Staphylococcus
MRSA10226	SAMN09401039	PRJNA475751	SRR7297389	Staphylococcus
MRSA10227	SAMN09401040	PRJNA475751	SRR7297390	Staphylococcus
MRSA10230	SAMN09401041	PRJNA475751	SRR7296768	Staphylococcus
MRSA10231	SAMN09401042	PRJNA475751	SRR7297376	Staphylococcus
MRSA10232	SAMN09401043	PRJNA475751	SRR7297393	Staphylococcus
MRSA10233	SAMN09401044	PRJNA475751	SRR7297394	Staphylococcus
MRSA10234	SAMN09401045	PRJNA475751	SRR7297391	Staphylococcus
MRSA10235	SAMN09401046	PRJNA475751	SRR7297392	Staphylococcus
MRSA10236	SAMN09401047	PRJNA475751	SRR7297361	Staphylococcus
MRSA10237	SAMN09401048	PRJNA475751	SRR7297362	Staphylococcus
MRSA10238	SAMN09401049	PRJNA475751	SRR7297284	Staphylococcus
MRSA10239	SAMN09401050	PRJNA475751	SRR7297285	Staphylococcus
MRSA10240	SAMN09401051	PRJNA475751	SRR7297286	Staphylococcus
MRSA10241	SAMN09401052	PRJNA475751	SRR7297287	Staphylococcus
MRSA10243	SAMN09401053	PRJNA475751	SRR7297288	Staphylococcus
MRSA10244	SAMN09401054	PRJNA475751	SRR7297289	Staphylococcus	X
MRSA10245	SAMN09401055	PRJNA475751	SRR7297290	Staphylococcus
MRSA10246	SAMN09401056	PRJNA475751	SRR7297291	Staphylococcus
MRSA10247	SAMN09401057	PRJNA475751	SRR7297276	Staphylococcus
MRSA10248	SAMN09401058	PRJNA475751	SRR7297277	Staphylococcus
MRSA10249	SAMN09401059	PRJNA475751	SRR7297087	Staphylococcus
MRSA10250	SAMN09401060	PRJNA475751	SRR7297577	Staphylococcus	X
MRSA10251	SAMN09401061	PRJNA475751	SRR7296870	Staphylococcus
MRSA10252	SAMN09401062	PRJNA475751	SRR7296869	Staphylococcus
MRSA10253	SAMN09401063	PRJNA475751	SRR7296868	Staphylococcus
MRSA10254	SAMN09401064	PRJNA475751	SRR7296769	Staphylococcus
MRSA10255	SAMN09401065	PRJNA475751	SRR7296866	Staphylococcus
MRSA10256	SAMN09401066	PRJNA475751	SRR7296865	Staphylococcus
MRSA10257	SAMN09401067	PRJNA475751	SRR7296811	Staphylococcus
MRSA10258	SAMN09401068	PRJNA475751	SRR7296809	Staphylococcus
MRSA10259	SAMN09401069	PRJNA475751	SRR7297462	Staphylococcus
MRSA10260	SAMN09401070	PRJNA475751	SRR7297463	Staphylococcus
MRSA10261	SAMN09401071	PRJNA475751	SRR7297460	Staphylococcus
MRSA10262	SAMN09401072	PRJNA475751	SRR7297461	Staphylococcus
MRSA10263	SAMN09401073	PRJNA475751	SRR7297466	Staphylococcus
MRSA10264	SAMN09401074	PRJNA475751	SRR7297467	Staphylococcus
MRSA10265	SAMN09401075	PRJNA475751	SRR7296772	Staphylococcus
MRSA10266	SAMN09401076	PRJNA475751	SRR7297167	Staphylococcus
MRSA10267	SAMN09401077	PRJNA475751	SRR7297178	Staphylococcus
MRSA10268	SAMN09401078	PRJNA475751	SRR7297184	Staphylococcus
MRSA10269	SAMN09401079	PRJNA475751	SRR7297429	Staphylococcus
MRSA10270	SAMN09401080	PRJNA475751	SRR7297428	Staphylococcus
MRSA10271	SAMN09401081	PRJNA475751	SRR7297152	Staphylococcus
MRSA10272	SAMN09401082	PRJNA475751	SRR7297151	Staphylococcus
MRSA10273	SAMN09401083	PRJNA475751	SRR7297154	Staphylococcus
MRSA10274	SAMN09401084	PRJNA475751	SRR7297153	Staphylococcus
MRSA10275	SAMN09401085	PRJNA475751	SRR7297156	Staphylococcus
MRSA10276	SAMN09401086	PRJNA475751	SRR7297155	Staphylococcus
MRSA10277	SAMN09401087	PRJNA475751	SRR7297450	Staphylococcus
MRSA10278	SAMN09401088	PRJNA475751	SRR7297447	Staphylococcus
MRSA10279	SAMN09401089	PRJNA475751	SRR7296973	Staphylococcus
MRSA10280	SAMN09401090	PRJNA475751	SRR7296974	Staphylococcus
MRSA10281	SAMN09401091	PRJNA475751	SRR7296976	Staphylococcus
MRSA10283	SAMN09401093	PRJNA475751	SRR7296954	Staphylococcus
MRSA10284	SAMN09401094	PRJNA475751	SRR7296885	Staphylococcus
MRSA10285	SAMN09401095	PRJNA475751	SRR7296963	Staphylococcus
MRSA10286	SAMN09401096	PRJNA475751	SRR7296969	Staphylococcus
MRSA10287	SAMN09401097	PRJNA475751	SRR7297136	Staphylococcus
MRSA10288	SAMN09401098	PRJNA475751	SRR7297137	Staphylococcus
MRSA10289	SAMN09401099	PRJNA475751	SRR7297017	Staphylococcus
MRSA10290	SAMN09401100	PRJNA475751	SRR7296938	Staphylococcus
MRSA10291	SAMN09401101	PRJNA475751	SRR7297360	Staphylococcus
MRSA10292	SAMN09401102	PRJNA475751	SRR7297359	Staphylococcus
MRSA10293	SAMN09401103	PRJNA475751	SRR7297366	Staphylococcus
MRSA10294	SAMN09401104	PRJNA475751	SRR7297365	Staphylococcus
MRSA10295	SAMN09401105	PRJNA475751	SRR7297364	Staphylococcus
MRSA10296	SAMN09401106	PRJNA475751	SRR7297363	Staphylococcus
MRSA10297	SAMN09401107	PRJNA475751	SRR7296836	Staphylococcus
MRSA10298	SAMN09401108	PRJNA475751	SRR7297405	Staphylococcus
MRSA10299	SAMN09401109	PRJNA475751	SRR7297036	Staphylococcus
MRSA10300	SAMN10435772	PRJNA475751	SRR8199655	Staphylococcus
MRSA10301	SAMN10435773	PRJNA475751	SRR8199654	Staphylococcus
MRSA10302	SAMN10435774	PRJNA475751	SRR8199653	Staphylococcus
MRSA10303	SAMN10435775	PRJNA475751	SRR8199652	Staphylococcus
MRSA10304	SAMN10435776	PRJNA475751	SRR8199131	Staphylococcus
MRSA10305	SAMN10435777	PRJNA475751	SRR8199128	Staphylococcus
MRSA10306	SAMN10435778	PRJNA475751	SRR8199060	Staphylococcus
MRSA10307	SAMN10435779	PRJNA475751	SRR8199061	Staphylococcus
MRSA10308	SAMN10435780	PRJNA475751	SRR8199062	Staphylococcus
MRSA10309	SAMN10435781	PRJNA475751	SRR8199063	Staphylococcus
MRSA10310	SAMN10435782	PRJNA475751	SRR8199064	Staphylococcus
MRSA10311	SAMN11285042	PRJNA475751	SRR8809839	Staphylococcus
MRSA10312	SAMN10435783	PRJNA475751	SRR8199065	Staphylococcus
MRSA10313	SAMN10435784	PRJNA475751	SRR8199066	Staphylococcus
MRSA10314	SAMN10435785	PRJNA475751	SRR8199067	Staphylococcus
MRSA10315	SAMN10435786	PRJNA475751	SRR8199052	Staphylococcus
MRSA10316	SAMN10435787	PRJNA475751	SRR8199053	Staphylococcus
MRSA10317	SAMN10435788	PRJNA475751	SRR8199676	Staphylococcus
MRSA10318	SAMN10435789	PRJNA475751	SRR8199677	Staphylococcus
MRSA10320	SAMN10435790	PRJNA475751	SRR8199674	Staphylococcus
MRSA10321	SAMN10435791	PRJNA475751	SRR8199675	Staphylococcus
MRSA10322	SAMN10435792	PRJNA475751	SRR8199672	Staphylococcus
MRSA10323	SAMN10435793	PRJNA475751	SRR8199673	Staphylococcus
MRSA10324	SAMN10435794	PRJNA475751	SRR8199670	Staphylococcus
MRSA10325	SAMN10435795	PRJNA475751	SRR8199671	Staphylococcus
MRSA10326	SAMN10435796	PRJNA475751	SRR8199680	Staphylococcus
MRSA10327	SAMN10435797	PRJNA475751	SRR8199681	Staphylococcus
MRSA10328	SAMN10435798	PRJNA475751	SRR8199310	Staphylococcus
MRSA10329	SAMN10435799	PRJNA475751	SRR8199309	Staphylococcus
MRSA10330	SAMN10435800	PRJNA475751	SRR8199312	Staphylococcus
MRSA10331	SAMN10435801	PRJNA475751	SRR8199311	Staphylococcus
MRSA10332	SAMN10435802	PRJNA475751	SRR8199306	Staphylococcus
MRSA10333	SAMN10435803	PRJNA475751	SRR8199497	Staphylococcus
MRSA10334	SAMN10435804	PRJNA475751	SRR8199308	Staphylococcus
MRSA10335	SAMN10435805	PRJNA475751	SRR8199307	Staphylococcus
MRSA10337	SAMN10435807	PRJNA475751	SRR8199317	Staphylococcus
MRSA10338	SAMN10435808	PRJNA475751	SRR8198806	Staphylococcus
MRSA10339	SAMN10435809	PRJNA475751	SRR8198807	Staphylococcus
MRSA10340	SAMN11285043	PRJNA475751	SRR8810560	Staphylococcus
MRSA10341	SAMN11285044	PRJNA475751	SRR8810247	Staphylococcus
MRSA10342	SAMN11285045	PRJNA475751	SRR8810551	Staphylococcus
MRSA10343	SAMN11285046	PRJNA475751	SRR8809974	Staphylococcus
MRSA10344	SAMN11285047	PRJNA475751	SRR8809975	Staphylococcus
MRSA10345	SAMN11285048	PRJNA475751	SRR8810623	Staphylococcus
MRSA10346	SAMN11285049	PRJNA475751	SRR8810629	Staphylococcus
MRSA10347	SAMN11285050	PRJNA475751	SRR8809978	Staphylococcus
MRSA10348	SAMN11285051	PRJNA475751	SRR8809979	Staphylococcus
MRSA10349	SAMN11285052	PRJNA475751	SRR8809976	Staphylococcus
MRSA10350	SAMN11285053	PRJNA475751	SRR8810259	Staphylococcus
MRSA10351	SAMN11285054	PRJNA475751	SRR8810262	Staphylococcus
MRSA10352	SAMN11285055	PRJNA475751	SRR8810363	Staphylococcus
MRSA10353	SAMN11285056	PRJNA475751	SRR8810232	Staphylococcus
MRSA10354	SAMN11285057	PRJNA475751	SRR8810233	Staphylococcus
MRSA10356	SAMN11285058	PRJNA475751	SRR8810022	Staphylococcus
MRSA10357	SAMN11285059	PRJNA475751	SRR8810178	Staphylococcus
MRSA10358	SAMN11285060	PRJNA475751	SRR8810020	Staphylococcus
MRSA10359	SAMN11285061	PRJNA475751	SRR8810021	Staphylococcus
MRSA10360	SAMN11285062	PRJNA475751	SRR8810452	Staphylococcus
MRSA10361	SAMN11285063	PRJNA475751	SRR8810451	Staphylococcus
MRSA10362	SAMN11285064	PRJNA475751	SRR8810454	Staphylococcus
MRSA10363	SAMN11285065	PRJNA475751	SRR8810453	Staphylococcus
MRSA10364	SAMN11285066	PRJNA475751	SRR8810464	Staphylococcus
MRSA10365	SAMN11285067	PRJNA475751	SRR8810101	Staphylococcus
MRSA10366	SAMN11285068	PRJNA475751	SRR8810450	Staphylococcus
MRSA10367	SAMN11285069	PRJNA475751	SRR8810449	Staphylococcus
MRSA10368	SAMN11285070	PRJNA475751	SRR8810456	Staphylococcus
MRSA10369	SAMN11285071	PRJNA475751	SRR8810455	Staphylococcus
MRSA10370	SAMN11285072	PRJNA475751	SRR8810188	Staphylococcus
MRSA10371	SAMN11285073	PRJNA475751	SRR8810187	Staphylococcus
MRSA10372	SAMN11285074	PRJNA475751	SRR8810185	Staphylococcus
MRSA10374	SAMN11285075	PRJNA475751	SRR8810080	Staphylococcus
MRSA10375	SAMN11285076	PRJNA475751	SRR8810186	Staphylococcus
MRSA10376	SAMN11285077	PRJNA475751	SRR8810624	Staphylococcus
MRSA10377	SAMN11285078	PRJNA475751	SRR8810643	Staphylococcus
MRSA10378	SAMN11285079	PRJNA475751	SRR8810189	Staphylococcus
MRSA10379	SAMN11285080	PRJNA475751	SRR8810192	Staphylococcus
MRSA10380	SAMN11285081	PRJNA475751	SRR8810381	Staphylococcus
MRSA10381	SAMN11285082	PRJNA475751	SRR8810517	Staphylococcus
MRSA10382	SAMN11285083	PRJNA475751	SRR8810146	Staphylococcus
MRSA10383	SAMN11285084	PRJNA475751	SRR8809772	Staphylococcus
MRSA10384	SAMN11285085	PRJNA475751	SRR8810382	Staphylococcus
MRSA10385	SAMN11285086	PRJNA475751	SRR8810385	Staphylococcus
MRSA10386	SAMN11285087	PRJNA475751	SRR8810459	Staphylococcus
MRSA10387	SAMN11285088	PRJNA475751	SRR8810068	Staphylococcus
MRSA10388	SAMN11285089	PRJNA475751	SRR8810617	Staphylococcus	X
MRSA10389	SAMN11285090	PRJNA475751	SRR8810563	Staphylococcus
MRSA10390	SAMN11285091	PRJNA475751	SRR8810305	Staphylococcus
MRSA10391	SAMN11285092	PRJNA475751	SRR8809956	Staphylococcus
MRSA10393	SAMN11285094	PRJNA475751	SRR8810553	Staphylococcus
MRSA10394	SAMN11285095	PRJNA475751	SRR8810226	Staphylococcus
MRSA10395	SAMN11285096	PRJNA475751	SRR8809866	Staphylococcus
MRSA10396	SAMN11285097	PRJNA475751	SRR8810011	Staphylococcus
MRSA10397	SAMN11285098	PRJNA475751	SRR8810003	Staphylococcus
MRSA10398	SAMN11285099	PRJNA475751	SRR8809911	Staphylococcus
MRSA10399	SAMN11285100	PRJNA475751	SRR8810646	Staphylococcus
MRSA10400	SAMN11285101	PRJNA475751	SRR8809879	Staphylococcus
MRSA10401	SAMN11285102	PRJNA475751	SRR8809884	Staphylococcus
MRSA10402	SAMN11285103	PRJNA475751	SRR8809814	Staphylococcus
MRSA10403	SAMN11285104	PRJNA475751	SRR8809809	Staphylococcus
MRSA10404	SAMN11285105	PRJNA475751	SRR8809963	Staphylococcus
MRSA10405	SAMN11285106	PRJNA475751	SRR8810058	Staphylococcus
MRSA10406	SAMN11285107	PRJNA475751	SRR8810293	Staphylococcus
MRSA10407	SAMN11285108	PRJNA475751	SRR8810615	Staphylococcus
MRSA10409	SAMN11285109	PRJNA475751	SRR8809874	Staphylococcus
MRSA10410	SAMN11285110	PRJNA475751	SRR8810182	Staphylococcus
MRSA10412	SAMN11285111	PRJNA475751	SRR8810183	Staphylococcus
MRSA10413	SAMN11285112	PRJNA475751	SRR8809818	Staphylococcus
PR00002	SAMN10435810	PRJNA475751	SRR8198808	Proteus
PR00003	SAMN10435811	PRJNA475751	SRR8198809	Proteus
PR00004	SAMN10435812	PRJNA475751	SRR8198802	Proteus
PR00005	SAMN10435813	PRJNA475751	SRR8198803	Proteus
PR00006	SAMN10435814	PRJNA475751	SRR8198804	Proteus
PR00007	SAMN10435815	PRJNA475751	SRR8198805	Proteus
PR00008	SAMN10435816	PRJNA475751	SRR8198800	Proteus
PR00009	SAMN10435817	PRJNA475751	SRR8198801	Proteus
PR00010	SAMN10435818	PRJNA475751	SRR8199075	Proteus
PR00011	SAMN10435819	PRJNA475751	SRR8199074	Proteus
PR00012	SAMN10435820	PRJNA475751	SRR8199073	Proteus
PR00013	SAMN10435821	PRJNA475751	SRR8199072	Proteus
PR00014	SAMN10435822	PRJNA475751	SRR8199079	Proteus	X
PR00015	SAMN10435823	PRJNA475751	SRR8199078	Proteus
PR00016	SAMN10435824	PRJNA475751	SRR8199077	Proteus	X
PR00017	SAMN10435825	PRJNA475751	SRR8199076	Proteus
PR00018	SAMN10435826	PRJNA475751	SRR8199070	Proteus
PR00019	SAMN10435827	PRJNA475751	SRR8199069	Proteus
PR00020	SAMN10435828	PRJNA475751	SRR8199186	Proteus	X
PR00021	SAMN10435829	PRJNA475751	SRR8199187	Proteus
PR00022	SAMN10435830	PRJNA475751	SRR8199184	Proteus
PR00023	SAMN10435831	PRJNA475751	SRR8199185	Proteus
PR00024	SAMN10435832	PRJNA475751	SRR8199190	Proteus
PR00025	SAMN10435833	PRJNA475751	SRR8199191	Proteus
PR00026	SAMN10435834	PRJNA475751	SRR8199188	Proteus
PR00027	SAMN10435835	PRJNA475751	SRR8199189	Proteus
PR00028	SAMN10435836	PRJNA475751	SRR8199180	Proteus	X
PR00030	SAMN10435838	PRJNA475751	SRR8199425	Proteus
PR00031	SAMN10435839	PRJNA475751	SRR8199424	Proteus
PR00032	SAMN10435840	PRJNA475751	SRR8199427	Proteus
PR00033	SAMN10435841	PRJNA475751	SRR8199426	Proteus
PR00034	SAMN10435842	PRJNA475751	SRR8199429	Proteus
PR00035	SAMN10435843	PRJNA475751	SRR8199428	Proteus
PR00037	SAMN10435844	PRJNA475751	SRR8199431	Proteus
PR00038	SAMN10435845	PRJNA475751	SRR8199430	Proteus
PR00039	SAMN10435846	PRJNA475751	SRR8199419	Proteus
PR00040	SAMN10435847	PRJNA475751	SRR8198865	Proteus
PR00042	SAMN10435848	PRJNA475751	SRR8198903	Proteus
PR00043	SAMN10435849	PRJNA475751	SRR8198904	Proteus
PR00044	SAMN11285113	PRJNA475751	SRR8810430	Proteus
PR00045	SAMN11285114	PRJNA475751	SRR8810272	Proteus
PR00047	SAMN11285116	PRJNA475751	SRR8810030	Proteus
PR00048	SAMN11285117	PRJNA475751	SRR8809925	Proteus
PR00049	SAMN11285118	PRJNA475751	SRR8809927	Proteus
PR00050	SAMN11285119	PRJNA475751	SRR8810567	Proteus
PR00051	SAMN11285120	PRJNA475751	SRR8810566	Proteus
PR00052	SAMN11285121	PRJNA475751	SRR8810564	Proteus
PR00054	SAMN11285122	PRJNA475751	SRR8810571	Proteus
PR00055	SAMN11285123	PRJNA475751	SRR8810570	Proteus	X
PR00056	SAMN11285124	PRJNA475751	SRR8810569	Proteus
PR00057	SAMN11285125	PRJNA475751	SRR8810568	Proteus
PR00058	SAMN11285126	PRJNA475751	SRR8809923	Proteus
PR00059	SAMN11285127	PRJNA475751	SRR8809817	Proteus
PR00060	SAMN11285128	PRJNA475751	SRR8810103	Proteus
PR00061	SAMN11285129	PRJNA475751	SRR8810620	Proteus
PR00062	SAMN11285130	PRJNA475751	SRR8810621	Proteus
PR00063	SAMN11285131	PRJNA475751	SRR8809900	Proteus	X
PR00064	SAMN11285132	PRJNA475751	SRR8810287	Proteus
PR00065	SAMN11285133	PRJNA475751	SRR8810056	Proteus
PR00066	SAMN11285134	PRJNA475751	SRR8810325	Proteus
PR00067	SAMN11285135	PRJNA475751	SRR8810066	Proteus
PR00068	SAMN11285136	PRJNA475751	SRR8810614	Proteus
PR00069	SAMN11285137	PRJNA475751	SRR8809883	Proteus
PR00070	SAMN11285138	PRJNA475751	SRR8810585	Proteus
PR00071	SAMN11285139	PRJNA475751	SRR8810071	Proteus
PR00072	SAMN11285140	PRJNA475751	SRR8810253	Proteus
PRV00002	SAMN10435850	PRJNA475751	SRR8198905	Providencia
PRV00003	SAMN10435851	PRJNA475751	SRR8198906	Providencia
PRV00004	SAMN10435852	PRJNA475751	SRR8198907	Providencia
PRV00005	SAMN10435853	PRJNA475751	SRR8198908	Providencia
PRV00006	SAMN10435854	PRJNA475751	SRR8198909	Providencia
PRV00007	SAMN10435855	PRJNA475751	SRR8198910	Providencia
PRV00009	SAMN11285141	PRJNA475751	SRR8810250	Providencia
PSA00018	SAMN10435856	PRJNA475751	SRR8198911	Pseudomonas
PSA00019	SAMN10435857	PRJNA475751	SRR8198876	Pseudomonas
PSA00020	SAMN10435858	PRJNA475751	SRR8199526	Pseudomonas
PSA00021	SAMN10435859	PRJNA475751	SRR8199525	Pseudomonas
PSA00022	SAMN10435860	PRJNA475751	SRR8199524	Pseudomonas
PSA00023	SAMN10435861	PRJNA475751	SRR8199523	Pseudomonas
PSA00024	SAMN10435862	PRJNA475751	SRR8199522	Pseudomonas
PSA00025	SAMN10435863	PRJNA475751	SRR8199521	Pseudomonas
PSA00026	SAMN10435864	PRJNA475751	SRR8199520	Pseudomonas
PSA00027	SAMN10435865	PRJNA475751	SRR8199519	Pseudomonas
PSA00029	SAMN10435866	PRJNA475751	SRR8199518	Pseudomonas
PSA00030	SAMN10435867	PRJNA475751	SRR8199517	Pseudomonas
PSA00031	SAMN10435868	PRJNA475751	SRR8199330	Pseudomonas
PSA00032	SAMN10435869	PRJNA475751	SRR8199331	Pseudomonas
PSA00033	SAMN10435870	PRJNA475751	SRR8199328	Pseudomonas
PSA00034	SAMN10435871	PRJNA475751	SRR8199329	Pseudomonas
PSA00035	SAMN10435872	PRJNA475751	SRR8199326	Pseudomonas
PSA00036	SAMN10435873	PRJNA475751	SRR8199327	Pseudomonas
PSA00038	SAMN10435875	PRJNA475751	SRR8199325	Pseudomonas
PSA00039	SAMN10435876	PRJNA475751	SRR8199322	Pseudomonas
PSA00040	SAMN10435877	PRJNA475751	SRR8199323	Pseudomonas
PSA00041	SAMN10435878	PRJNA475751	SRR8198940	Pseudomonas
PSA00042	SAMN10435879	PRJNA475751	SRR8198939	Pseudomonas	X
PSA00043	SAMN10435880	PRJNA475751	SRR8198942	Pseudomonas
PSA00044	SAMN10435881	PRJNA475751	SRR8198941	Pseudomonas
PSA00045	SAMN10435882	PRJNA475751	SRR8198936	Pseudomonas
PSA00046	SAMN10435883	PRJNA475751	SRR8198935	Pseudomonas
PSA00047	SAMN10435884	PRJNA475751	SRR8198938	Pseudomonas
PSA00048	SAMN10435885	PRJNA475751	SRR8198937	Pseudomonas	X
PSA00049	SAMN10435886	PRJNA475751	TMP7D1B14	Pseudomonas
PSA00050	SAMN10435887	PRJNA475751	TMP7D1B13	Pseudomonas
PSA00051	SAMN10435888	PRJNA475751	SRR8199509	Pseudomonas
PSA00052	SAMN10435889	PRJNA475751	SRR8199508	Pseudomonas
PSA00053	SAMN10435890	PRJNA475751	SRR8199511	Pseudomonas
PSA00054	SAMN10435891	PRJNA475751	SRR8199510	Pseudomonas
PSA00055	SAMN10435892	PRJNA475751	SRR8199513	Pseudomonas
PSA00056	SAMN10435893	PRJNA475751	SRR8199512	Pseudomonas
PSA00057	SAMN10435894	PRJNA475751	SRR8199228	Pseudomonas
PSA00058	SAMN10435895	PRJNA475751	SRR8199222	Pseudomonas
PSA00059	SAMN10435896	PRJNA475751	SRR8199156	Pseudomonas
PSA00060	SAMN10435897	PRJNA475751	SRR8199150	Pseudomonas
PSA00061	SAMN10435898	PRJNA475751	SRR8198810	Pseudomonas
PSA00062	SAMN10435899	PRJNA475751	SRR8198812	Pseudomonas
PSA00063	SAMN10435900	PRJNA475751	SRR8199088	Pseudomonas
PSA00064	SAMN10435901	PRJNA475751	SRR8199096	Pseudomonas
PSA00065	SAMN10435902	PRJNA475751	SRR8198816	Pseudomonas
PSA00066	SAMN10435903	PRJNA475751	SRR8198818	Pseudomonas
PSA00067	SAMN10435904	PRJNA475751	SRR8198813	Pseudomonas
PSA00070	SAMN10435907	PRJNA475751	SRR8198886	Pseudomonas
PSA00072	SAMN10435908	PRJNA475751	SRR8199100	Pseudomonas
PSA00073	SAMN10435909	PRJNA475751	SRR8199097	Pseudomonas
PSA00074	SAMN10435910	PRJNA475751	SRR8199095	Pseudomonas
PSA00075	SAMN10435911	PRJNA475751	SRR8199093	Pseudomonas
PSA00076	SAMN10435912	PRJNA475751	SRR8199092	Pseudomonas
PSA00077	SAMN10435913	PRJNA475751	SRR8199090	Pseudomonas
PSA00078	SAMN10435914	PRJNA475751	SRR8199089	Pseudomonas
PSA00079	SAMN10435915	PRJNA475751	SRR8199087	Pseudomonas
PSA00080	SAMN10435916	PRJNA475751	SRR8199296	Pseudomonas
PSA00081	SAMN10435917	PRJNA475751	SRR8199295	Pseudomonas
PSA00082	SAMN10435918	PRJNA475751	SRR8199591	Pseudomonas
PSA00083	SAMN10435919	PRJNA475751	SRR8199592	Pseudomonas	X
PSA00084	SAMN10435920	PRJNA475751	SRR8199593	Pseudomonas	X
PSA00085	SAMN10435921	PRJNA475751	SRR8199594	Pseudomonas
PSA00086	SAMN10435922	PRJNA475751	SRR8199595	Pseudomonas
PSA00087	SAMN10435923	PRJNA475751	SRR8199596	Pseudomonas
PSA00088	SAMN10435924	PRJNA475751	SRR8199597	Pseudomonas
PSA00089	SAMN10435925	PRJNA475751	SRR8199598	Pseudomonas
PSA00090	SAMN10435926	PRJNA475751	SRR8199599	Pseudomonas
PSA00091	SAMN10435927	PRJNA475751	SRR8199600	Pseudomonas
PSA00092	SAMN10435928	PRJNA475751	SRR8199696	Pseudomonas
PSA00093	SAMN10435929	PRJNA475751	SRR8199695	Pseudomonas
PSA00094	SAMN10435930	PRJNA475751	SRR8199700	Pseudomonas
PSA00095	SAMN10435931	PRJNA475751	SRR8199698	Pseudomonas
PSA00096	SAMN10435932	PRJNA475751	SRR8199692	Pseudomonas
PSA00097	SAMN10435933	PRJNA475751	SRR8199690	Pseudomonas
PSA00098	SAMN10435934	PRJNA475751	SRR8199694	Pseudomonas
PSA00099	SAMN10435935	PRJNA475751	SRR8199693	Pseudomonas
PSA00100	SAMN10435936	PRJNA475751	SRR8198989	Pseudomonas
PSA00101	SAMN10435937	PRJNA475751	SRR8198988	Pseudomonas
PSA00102	SAMN10435938	PRJNA475751	SRR8199364	Pseudomonas
PSA00103	SAMN10435939	PRJNA475751	SRR8199367	Pseudomonas
PSA00104	SAMN10435940	PRJNA475751	SRR8199360	Pseudomonas
PSA00105	SAMN10435941	PRJNA475751	SRR8199362	Pseudomonas
PSA00106	SAMN10435942	PRJNA475751	SRR8199358	Pseudomonas
PSA00107	SAMN10435943	PRJNA475751	SRR8199359	Pseudomonas
PSA00108	SAMN10435944	PRJNA475751	SRR8199350	Pseudomonas	X
PSA00109	SAMN10435945	PRJNA475751	SRR8199354	Pseudomonas
PSA00110	SAMN10435946	PRJNA475751	SRR8199386	Pseudomonas
PSA00111	SAMN10435947	PRJNA475751	SRR8199387	Pseudomonas
PSA00112	SAMN10435948	PRJNA475751	SRR8199143	Pseudomonas
PSA00114	SAMN10435949	PRJNA475751	SRR8199142	Pseudomonas
PSA00115	SAMN10435950	PRJNA475751	SRR8199141	Pseudomonas
PSA00116	SAMN10435951	PRJNA475751	SRR8199140	Pseudomonas
PSA00117	SAMN10435952	PRJNA475751	SRR8199147	Pseudomonas
PSA00118	SAMN10435953	PRJNA475751	SRR8199146	Pseudomonas
PSA00121	SAMN10435956	PRJNA475751	SRR8199135	Pseudomonas
PSA00122	SAMN10435957	PRJNA475751	SRR8199134	Pseudomonas
PSA00124	SAMN10435958	PRJNA475751	SRR8199489	Pseudomonas
PSA00125	SAMN10435959	PRJNA475751	SRR8199490	Pseudomonas
PSA00126	SAMN10435960	PRJNA475751	SRR8199491	Pseudomonas
PSA00127	SAMN10435961	PRJNA475751	SRR8199492	Pseudomonas
PSA00128	SAMN10435962	PRJNA475751	SRR8199485	Pseudomonas
PSA00129	SAMN10435963	PRJNA475751	SRR8199486	Pseudomonas
PSA00130	SAMN10435964	PRJNA475751	SRR8199487	Pseudomonas
PSA00131	SAMN10435965	PRJNA475751	SRR8199488	Pseudomonas
PSA00132	SAMN10435966	PRJNA475751	SRR8199481	Pseudomonas
PSA00133	SAMN10435967	PRJNA475751	SRR8199482	Pseudomonas
PSA00134	SAMN10435968	PRJNA475751	SRR8199110	Pseudomonas
PSA00135	SAMN10435969	PRJNA475751	SRR8199109	Pseudomonas
PSA00136	SAMN10435970	PRJNA475751	SRR8199112	Pseudomonas
PSA00137	SAMN10435971	PRJNA475751	SRR8199111	Pseudomonas
PSA00138	SAMN10435972	PRJNA475751	SRR8199114	Pseudomonas
PSA00139	SAMN10435973	PRJNA475751	SRR8199113	Pseudomonas
PSA00140	SAMN10435974	PRJNA475751	SRR8199116	Pseudomonas
PSA00141	SAMN10435975	PRJNA475751	SRR8199115	Pseudomonas
PSA00142	SAMN10435976	PRJNA475751	SRR8199118	Pseudomonas
PSA00143	SAMN10435977	PRJNA475751	SRR8199117	Pseudomonas
PSA00144	SAMN10435978	PRJNA475751	SRR8199459	Pseudomonas
PSA00145	SAMN10435979	PRJNA475751	SRR8199460	Pseudomonas
PSA00146	SAMN10435980	PRJNA475751	SRR8199457	Pseudomonas
PSA00148	SAMN10435982	PRJNA475751	SRR8199463	Pseudomonas
PSA00149	SAMN10435983	PRJNA475751	SRR8199464	Pseudomonas
PSA00151	SAMN10435984	PRJNA475751	SRR8199461	Pseudomonas
PSA00152	SAMN10435985	PRJNA475751	SRR8199462	Pseudomonas
PSA00153	SAMN10435986	PRJNA475751	SRR8199465	Pseudomonas
PSA00154	SAMN10435987	PRJNA475751	SRR8199466	Pseudomonas
PSA00155	SAMN10435988	PRJNA475751	SRR8199132	Pseudomonas
PSA00156	SAMN10435989	PRJNA475751	SRR8199133	Pseudomonas
PSA00157	SAMN10435990	PRJNA475751	SRR8198992	Pseudomonas
PSA00158	SAMN10435991	PRJNA475751	SRR8198993	Pseudomonas
PSA00159	SAMN10435992	PRJNA475751	SRR8199136	Pseudomonas
PSA00160	SAMN10435993	PRJNA475751	SRR8199137	Pseudomonas
PSA00161	SAMN10435994	PRJNA475751	SRR8199138	Pseudomonas
PSA00162	SAMN10435995	PRJNA475751	SRR8199139	Pseudomonas
PSA00165	SAMN10435998	PRJNA475751	SRR8198795	Pseudomonas
PSA00166	SAMN10435999	PRJNA475751	SRR8198794	Pseudomonas
PSA00167	SAMN10436000	PRJNA475751	SRR8198793	Pseudomonas
PSA00168	SAMN10436001	PRJNA475751	SRR8198792	Pseudomonas
PSA00169	SAMN10436002	PRJNA475751	SRR8198791	Pseudomonas
PSA00170	SAMN10436003	PRJNA475751	SRR8198790	Pseudomonas
PSA00171	SAMN10436004	PRJNA475751	SRR8198789	Pseudomonas
PSA00172	SAMN10436005	PRJNA475751	SRR8198788	Pseudomonas
PSA00173	SAMN10436006	PRJNA475751	SRR8198787	Pseudomonas
PSA00174	SAMN10436007	PRJNA475751	SRR8198786	Pseudomonas
PSA00175	SAMN10436008	PRJNA475751	SRR8199394	Pseudomonas
PSA00176	SAMN10436009	PRJNA475751	SRR8199398	Pseudomonas
PSA00177	SAMN10436010	PRJNA475751	SRR8199389	Pseudomonas
PSA00178	SAMN10436011	PRJNA475751	SRR8199392	Pseudomonas
PSA00179	SAMN10436012	PRJNA475751	SRR8199039	Pseudomonas
PSA00180	SAMN10436013	PRJNA475751	SRR8199417	Pseudomonas
PSA00181	SAMN10436014	PRJNA475751	SRR8199403	Pseudomonas
PSA00183	SAMN10436016	PRJNA475751	SRR8199054	Pseudomonas
PSA00184	SAMN10436017	PRJNA475751	SRR8199055	Pseudomonas
PSA00185	SAMN10436018	PRJNA475751	SRR8199107	Pseudomonas
PSA00186	SAMN10436019	PRJNA475751	SRR8199106	Pseudomonas
PSA00187	SAMN10436020	PRJNA475751	SRR8199357	Pseudomonas
PSA00188	SAMN10436021	PRJNA475751	SRR8199341	Pseudomonas
PSA00189	SAMN10436022	PRJNA475751	SRR8199122	Pseudomonas
PSA00190	SAMN10436023	PRJNA475751	SRR8199119	Pseudomonas
PSA00191	SAMN10436024	PRJNA475751	SRR8199423	Pseudomonas
PSA00192	SAMN10436025	PRJNA475751	SRR8199400	Pseudomonas
PSA00193	SAMN10436026	PRJNA475751	SRR8199699	Pseudomonas
PSA00194	SAMN10436027	PRJNA475751	SRR8199697	Pseudomonas
PSA00195	SAMN10436028	PRJNA475751	SRR8199601	Pseudomonas
PSA00196	SAMN10436029	PRJNA475751	SRR8199603	Pseudomonas
PSA00197	SAMN10436030	PRJNA475751	SRR8199605	Pseudomonas
PSA00198	SAMN10436031	PRJNA475751	SRR8199606	Pseudomonas
PSA00199	SAMN10436032	PRJNA475751	SRR8199589	Pseudomonas
PSA00200	SAMN10436033	PRJNA475751	SRR8199590	Pseudomonas
PSA00201	SAMN10436034	PRJNA475751	SRR8199493	Pseudomonas
PSA00202	SAMN10436035	PRJNA475751	SRR8199499	Pseudomonas
PSA00203	SAMN10436036	PRJNA475751	SRR8199625	Pseudomonas
PSA00204	SAMN10436037	PRJNA475751	SRR8199626	Pseudomonas
PSA00205	SAMN10436038	PRJNA475751	SRR8198956	Pseudomonas
PSA00206	SAMN10436039	PRJNA475751	SRR8198954	Pseudomonas
PSA00207	SAMN10436040	PRJNA475751	SRR8198952	Pseudomonas
PSA00208	SAMN10436041	PRJNA475751	SRR8198951	Pseudomonas
PSA00209	SAMN10436042	PRJNA475751	SRR8198965	Pseudomonas
PSA00210	SAMN10436043	PRJNA475751	SRR8198963	Pseudomonas
PSA00211	SAMN10436044	PRJNA475751	SRR8198961	Pseudomonas
PSA00212	SAMN10436045	PRJNA475751	SRR8198959	Pseudomonas
PSA00213	SAMN10436046	PRJNA475751	SRR8199264	Pseudomonas
PSA00214	SAMN10436047	PRJNA475751	SRR8199263	Pseudomonas
PSA00215	SAMN10436048	PRJNA475751	SRR8198867	Pseudomonas
PSA00216	SAMN10436049	PRJNA475751	SRR8198868	Pseudomonas
PSA00217	SAMN10436050	PRJNA475751	SRR8199178	Pseudomonas
PSA00218	SAMN10436051	PRJNA475751	SRR8198866	Pseudomonas
PSA00219	SAMN10436052	PRJNA475751	SRR8198863	Pseudomonas
PSA00220	SAMN10436053	PRJNA475751	SRR8198864	Pseudomonas	X
PSA00221	SAMN10436054	PRJNA475751	SRR8198861	Pseudomonas
PSA00222	SAMN10436055	PRJNA475751	SRR8198862	Pseudomonas
PSA00223	SAMN10436056	PRJNA475751	SRR8198869	Pseudomonas
PSA00224	SAMN10436057	PRJNA475751	SRR8198870	Pseudomonas
PSA00226	SAMN10436058	PRJNA475751	SRR8199647	Pseudomonas
PSA00228	SAMN10436059	PRJNA475751	SRR8199643	Pseudomonas
PSA00229	SAMN10436060	PRJNA475751	SRR8199484	Pseudomonas
PSA00230	SAMN10436061	PRJNA475751	SRR8199483	Pseudomonas	X
PSA00231	SAMN10436062	PRJNA475751	SRR8199478	Pseudomonas
PSA00232	SAMN10436063	PRJNA475751	SRR8199477	Pseudomonas
PSA00233	SAMN10436064	PRJNA475751	SRR8199480	Pseudomonas
PSA00234	SAMN10436065	PRJNA475751	SRR8199479	Pseudomonas	X
PSA00235	SAMN10436066	PRJNA475751	SRR8199607	Pseudomonas
PSA00236	SAMN10436067	PRJNA475751	SRR8199669	Pseudomonas
PSA00237	SAMN10436068	PRJNA475751	SRR8199399	Pseudomonas
PSA00238	SAMN10436069	PRJNA475751	SRR8198817	Pseudomonas
PSA00240	SAMN10436070	PRJNA475751	SRR8199401	Pseudomonas
PSA00241	SAMN10436071	PRJNA475751	SRR8199402	Pseudomonas
PSA00242	SAMN10436072	PRJNA475751	SRR8198821	Pseudomonas
PSA00243	SAMN10436073	PRJNA475751	SRR8199404	Pseudomonas
PSA00244	SAMN10436074	PRJNA475751	SRR8199405	Pseudomonas
PSA00245	SAMN10436075	PRJNA475751	SRR8199406	Pseudomonas
PSA00246	SAMN10436076	PRJNA475751	SRR8198798	Pseudomonas
PSA00247	SAMN10436077	PRJNA475751	SRR8199395	Pseudomonas
PSA00248	SAMN10436078	PRJNA475751	SRR8199002	Pseudomonas
PSA00249	SAMN10436079	PRJNA475751	SRR8199001	Pseudomonas
PSA00250	SAMN10436080	PRJNA475751	SRR8199000	Pseudomonas
PSA00251	SAMN10436081	PRJNA475751	SRR8198999	Pseudomonas
PSA00253	SAMN10436082	PRJNA475751	SRR8198998	Pseudomonas
PSA00255	SAMN10436084	PRJNA475751	SRR8198996	Pseudomonas
PSA00256	SAMN10436085	PRJNA475751	SRR8198995	Pseudomonas
PSA00257	SAMN10436086	PRJNA475751	SRR8199010	Pseudomonas
PSA00258	SAMN10436087	PRJNA475751	SRR8199009	Pseudomonas
PSA00259	SAMN10436088	PRJNA475751	SRR8198901	Pseudomonas
PSA00260	SAMN10436089	PRJNA475751	SRR8198899	Pseudomonas
PSA00261	SAMN10436090	PRJNA475751	SRR8199356	Pseudomonas
PSA00262	SAMN10436091	PRJNA475751	SRR8198887	Pseudomonas
PSA00263	SAMN10436092	PRJNA475751	SRR8198796	Pseudomonas
PSA00264	SAMN10436093	PRJNA475751	SRR8198776	Pseudomonas
PSA00265	SAMN10436094	PRJNA475751	SRR8199422	Pseudomonas
PSA00266	SAMN10436095	PRJNA475751	SRR8198902	Pseudomonas
PSA00267	SAMN10436096	PRJNA475751	SRR8199421	Pseudomonas
PSA00268	SAMN10436097	PRJNA475751	SRR8199420	Pseudomonas
PSA00269	SAMN10436098	PRJNA475751	SRR8199565	Pseudomonas
PSA00270	SAMN10436099	PRJNA475751	SRR8199567	Pseudomonas
PSA00271	SAMN10436100	PRJNA475751	SRR8199568	Pseudomonas
PSA00272	SAMN10436101	PRJNA475751	SRR8199570	Pseudomonas
PSA00273	SAMN10436102	PRJNA475751	SRR8199552	Pseudomonas
PSA00275	SAMN10436103	PRJNA475751	SRR8199556	Pseudomonas
PSA00276	SAMN10436104	PRJNA475751	SRR8199562	Pseudomonas
PSA00277	SAMN10436105	PRJNA475751	SRR8199563	Pseudomonas
PSA00278	SAMN10436106	PRJNA475751	SRR8199182	Pseudomonas
PSA00279	SAMN10436107	PRJNA475751	SRR8199183	Pseudomonas
PSA00280	SAMN10436108	PRJNA475751	SRR8199582	Pseudomonas
PSA00281	SAMN10436109	PRJNA475751	SRR8199581	Pseudomonas
PSA00282	SAMN10436110	PRJNA475751	SRR8199628	Pseudomonas	X
PSA00283	SAMN10436111	PRJNA475751	SRR8199627	Pseudomonas
PSA00284	SAMN10436112	PRJNA475751	SRR8199622	Pseudomonas
PSA00285	SAMN10436113	PRJNA475751	SRR8199621	Pseudomonas
PSA00287	SAMN10436115	PRJNA475751	SRR8199579	Pseudomonas
PSA00289	SAMN10436117	PRJNA475751	SRR8199443	Pseudomonas
PSA00290	SAMN10436118	PRJNA475751	SRR8199249	Pseudomonas
PSA00291	SAMN10436119	PRJNA475751	SRR8199250	Pseudomonas
PSA00292	SAMN10436120	PRJNA475751	SRR8199027	Pseudomonas
PSA00293	SAMN10436121	PRJNA475751	SRR8199028	Pseudomonas
PSA00294	SAMN10436122	PRJNA475751	SRR8199025	Pseudomonas
PSA00296	SAMN10436123	PRJNA475751	SRR8199026	Pseudomonas
PSA00297	SAMN10436124	PRJNA475751	SRR8199023	Pseudomonas
PSA00298	SAMN10436125	PRJNA475751	SRR8199024	Pseudomonas
PSA00299	SAMN10436126	PRJNA475751	SRR8199103	Pseudomonas
PSA00301	SAMN10436128	PRJNA475751	SRR8198974	Pseudomonas
PSA00302	SAMN10436129	PRJNA475751	SRR8198972	Pseudomonas
PSA00303	SAMN10436130	PRJNA475751	SRR8198971	Pseudomonas
PSA00304	SAMN10436131	PRJNA475751	SRR8198969	Pseudomonas
PSA00305	SAMN10436132	PRJNA475751	SRR8198968	Pseudomonas
PSA00306	SAMN10436133	PRJNA475751	SRR8198966	Pseudomonas
PSA00307	SAMN10436134	PRJNA475751	SRR8198964	Pseudomonas
PSA00308	SAMN10436135	PRJNA475751	SRR8198962	Pseudomonas
PSA00309	SAMN11285142	PRJNA475751	SRR8810251	Pseudomonas	X
PSA00310	SAMN10436136	PRJNA475751	SRR8198934	Pseudomonas
PSA00312	SAMN10436138	PRJNA475751	SRR8198943	Pseudomonas
PSA00313	SAMN10436139	PRJNA475751	SRR8198944	Pseudomonas
PSA00314	SAMN10436140	PRJNA475751	SRR8198945	Pseudomonas
PSA00315	SAMN10436141	PRJNA475751	SRR8198947	Pseudomonas
PSA00316	SAMN10436142	PRJNA475751	SRR8199265	Pseudomonas
PSA00317	SAMN10436143	PRJNA475751	SRR8199266	Pseudomonas
PSA00318	SAMN10436144	PRJNA475751	SRR8199267	Pseudomonas
PSA00319	SAMN10436145	PRJNA475751	SRR8199268	Pseudomonas
PSA00321	SAMN10436146	PRJNA475751	SRR8198777	Pseudomonas
PSA00322	SAMN10436147	PRJNA475751	SRR8199575	Pseudomonas
PSA00323	SAMN10436148	PRJNA475751	SRR8199223	Pseudomonas	X
PSA00324	SAMN10436149	PRJNA475751	SRR8199229	Pseudomonas
PSA00325	SAMN10436150	PRJNA475751	SRR8199225	Pseudomonas
PSA00326	SAMN10436151	PRJNA475751	SRR8199224	Pseudomonas	X
PSA00327	SAMN10436152	PRJNA475751	SRR8199227	Pseudomonas
PSA00328	SAMN10436153	PRJNA475751	SRR8199226	Pseudomonas
PSA00329	SAMN10436154	PRJNA475751	SRR8199689	Pseudomonas
PSA00330	SAMN10436155	PRJNA475751	SRR8199688	Pseudomonas
PSA00331	SAMN10436156	PRJNA475751	SRR8199219	Pseudomonas
PSA00332	SAMN10436157	PRJNA475751	SRR8199218	Pseudomonas
PSA00333	SAMN10436158	PRJNA475751	SRR8199338	Pseudomonas
PSA00334	SAMN10436159	PRJNA475751	SRR8199557	Pseudomonas
PSA00335	SAMN10436160	PRJNA475751	SRR8199554	Pseudomonas
PSA00337	SAMN10436161	PRJNA475751	SRR8199555	Pseudomonas
PSA00338	SAMN10436162	PRJNA475751	SRR8199560	Pseudomonas
PSA00339	SAMN10436163	PRJNA475751	SRR8199561	Pseudomonas
PSA00340	SAMN10436164	PRJNA475751	SRR8199558	Pseudomonas
PSA00341	SAMN10436165	PRJNA475751	SRR8199559	Pseudomonas
PSA00342	SAMN11285144	PRJNA475751	SRR8810221	Pseudomonas
PSA00343	SAMN10436166	PRJNA475751	SRR8199321	Pseudomonas
PSA00344	SAMN10436167	PRJNA475751	SRR8199551	Pseudomonas
PSA00346	SAMN10436169	PRJNA475751	SRR8199368	Pseudomonas
PSA00347	SAMN10436170	PRJNA475751	SRR8199365	Pseudomonas
PSA00348	SAMN11285145	PRJNA475751	SRR8810227	Pseudomonas
PSA00349	SAMN10436171	PRJNA475751	SRR8199363	Pseudomonas
PSA00350	SAMN10436172	PRJNA475751	SRR8199059	Pseudomonas
PSA00351	SAMN10436173	PRJNA475751	SRR8199058	Pseudomonas
PSA00352	SAMN10436174	PRJNA475751	SRR8199057	Pseudomonas
PSA00354	SAMN10436175	PRJNA475751	SRR8199056	Pseudomonas
PSA00355	SAMN10436176	PRJNA475751	SRR8199091	Pseudomonas
PSA00356	SAMN10436177	PRJNA475751	SRR8199691	Pseudomonas
PSA00357	SAMN10436178	PRJNA475751	SRR8198784	Pseudomonas
PSA00358	SAMN10436179	PRJNA475751	SRR8198785	Pseudomonas
PSA00359	SAMN10436180	PRJNA475751	SRR8199495	Pseudomonas
PSA00361	SAMN10436182	PRJNA475751	SRR8198780	Pseudomonas
PSA00362	SAMN10436183	PRJNA475751	SRR8198781	Pseudomonas
PSA00363	SAMN10436184	PRJNA475751	SRR8198782	Pseudomonas
PSA00364	SAMN10436185	PRJNA475751	SRR8198783	Pseudomonas
PSA00366	SAMN10436186	PRJNA475751	SRR8199051	Pseudomonas
PSA00367	SAMN10436187	PRJNA475751	SRR8199583	Pseudomonas
PSA00368	SAMN10436188	PRJNA475751	SRR8199469	Pseudomonas
PSA00369	SAMN10436189	PRJNA475751	SRR8199470	Pseudomonas
PSA00370	SAMN10436190	PRJNA475751	SRR8199467	Pseudomonas
PSA00371	SAMN10436191	PRJNA475751	SRR8199468	Pseudomonas
PSA00374	SAMN11285146	PRJNA475751	SRR8810491	Pseudomonas
PSA00375	SAMN10436193	PRJNA475751	SRR8199474	Pseudomonas
PSA00377	SAMN10436195	PRJNA475751	SRR8199472	Pseudomonas
PSA00380	SAMN10436196	PRJNA475751	SRR8199475	Pseudomonas
PSA00381	SAMN10436197	PRJNA475751	SRR8199476	Pseudomonas
PSA00382	SAMN10436198	PRJNA475751	SRR8199121	Pseudomonas
PSA00386	SAMN10436202	PRJNA475751	SRR8199125	Pseudomonas
PSA00387	SAMN10436203	PRJNA475751	SRR8199124	Pseudomonas
PSA00388	SAMN10436204	PRJNA475751	SRR8199127	Pseudomonas
PSA00389	SAMN10436205	PRJNA475751	SRR8199126	Pseudomonas
PSA00390	SAMN10436206	PRJNA475751	SRR8199129	Pseudomonas
PSA00391	SAMN10436207	PRJNA475751	SRR8198973	Pseudomonas
PSA00392	SAMN10436208	PRJNA475751	SRR8199253	Pseudomonas
PSA00393	SAMN10436209	PRJNA475751	SRR8199254	Pseudomonas
PSA00394	SAMN10436210	PRJNA475751	SRR8199255	Pseudomonas
PSA00395	SAMN10436211	PRJNA475751	SRR8199256	Pseudomonas
PSA00396	SAMN10436212	PRJNA475751	SRR8199257	Pseudomonas
PSA00397	SAMN10436213	PRJNA475751	SRR8199258	Pseudomonas
PSA00398	SAMN10436214	PRJNA475751	SRR8199259	Pseudomonas
PSA00399	SAMN10436215	PRJNA475751	SRR8199260	Pseudomonas
PSA00400	SAMN10436216	PRJNA475751	SRR8199251	Pseudomonas
PSA00401	SAMN10436217	PRJNA475751	SRR8199252	Pseudomonas
PSA00402	SAMN10436218	PRJNA475751	SRR8198857	Pseudomonas
PSA00403	SAMN10436219	PRJNA475751	SRR8199246	Pseudomonas
PSA00404	SAMN10436220	PRJNA475751	SRR8198855	Pseudomonas
PSA00405	SAMN10436221	PRJNA475751	SRR8198854	Pseudomonas
PSA00406	SAMN10436222	PRJNA475751	SRR8198853	Pseudomonas
PSA00407	SAMN10436223	PRJNA475751	SRR8198852	Pseudomonas
PSA00408	SAMN10436224	PRJNA475751	SRR8198851	Pseudomonas
PSA00410	SAMN10436226	PRJNA475751	SRR8198860	Pseudomonas
PSA00411	SAMN10436227	PRJNA475751	SRR8198859	Pseudomonas
PSA00413	SAMN10436228	PRJNA475751	SRR8199021	Pseudomonas
PSA00414	SAMN10436229	PRJNA475751	SRR8199022	Pseudomonas
PSA00415	SAMN10436230	PRJNA475751	SRR8199019	Pseudomonas
PSA00416	SAMN10436231	PRJNA475751	SRR8199020	Pseudomonas
PSA00417	SAMN10436232	PRJNA475751	SRR8199241	Pseudomonas
PSA00418	SAMN10436233	PRJNA475751	SRR8199018	Pseudomonas
PSA00419	SAMN10436234	PRJNA475751	SRR8199015	Pseudomonas
PSA00420	SAMN10436235	PRJNA475751	SRR8199240	Pseudomonas
PSA00421	SAMN10436236	PRJNA475751	SRR8199013	Pseudomonas
PSA00422	SAMN10436237	PRJNA475751	SRR8199014	Pseudomonas
PSA00423	SAMN10436238	PRJNA475751	SRR8199618	Pseudomonas
PSA00424	SAMN10436239	PRJNA475751	SRR8199617	Pseudomonas
PSA00425	SAMN10436240	PRJNA475751	SRR8199620	Pseudomonas
PSA00426	SAMN10436241	PRJNA475751	SRR8199619	Pseudomonas
PSA00427	SAMN11285147	PRJNA475751	SRR8810193	Pseudomonas	X
PSA00428	SAMN10436242	PRJNA475751	SRR8199614	Pseudomonas
PSA00429	SAMN10436243	PRJNA475751	SRR8199613	Pseudomonas
PSA00430	SAMN10436244	PRJNA475751	SRR8199616	Pseudomonas
PSA00432	SAMN10436246	PRJNA475751	SRR8199612	Pseudomonas
PSA00433	SAMN10436247	PRJNA475751	SRR8199611	Pseudomonas
PSA00434	SAMN10436248	PRJNA475751	SRR8199708	Pseudomonas	X
PSA00435	SAMN10436249	PRJNA475751	SRR8199709	Pseudomonas
PSA00436	SAMN10436250	PRJNA475751	SRR8199710	Pseudomonas
PSA00437	SAMN10436251	PRJNA475751	SRR8199711	Pseudomonas
PSA00438	SAMN10436252	PRJNA475751	SRR8199704	Pseudomonas
PSA00439	SAMN10436253	PRJNA475751	SRR8199705	Pseudomonas
PSA00440	SAMN10436254	PRJNA475751	SRR8199706	Pseudomonas
PSA00441	SAMN10436255	PRJNA475751	SRR8199707	Pseudomonas
PSA00442	SAMN10436256	PRJNA475751	SRR8199102	Pseudomonas
PSA00443	SAMN10436257	PRJNA475751	SRR8198838	Pseudomonas
PSA00444	SAMN10436258	PRJNA475751	SRR8199349	Pseudomonas
PSA00445	SAMN10436259	PRJNA475751	SRR8199348	Pseudomonas
PSA00447	SAMN10436261	PRJNA475751	SRR8199346	Pseudomonas
PSA00448	SAMN10436262	PRJNA475751	SRR8199353	Pseudomonas
PSA00449	SAMN11285148	PRJNA475751	SRR8809819	Pseudomonas
PSA00450	SAMN10436263	PRJNA475751	SRR8199352	Pseudomonas
PSA00451	SAMN10436264	PRJNA475751	SRR8199351	Pseudomonas
PSA00452	SAMN10436265	PRJNA475751	SRR8199233	Pseudomonas
PSA00453	SAMN10436266	PRJNA475751	SRR8199355	Pseudomonas
PSA00454	SAMN10436267	PRJNA475751	SRR8199237	Pseudomonas
PSA00455	SAMN10436268	PRJNA475751	SRR8198832	Pseudomonas
PSA00456	SAMN10436269	PRJNA475751	SRR8198833	Pseudomonas
PSA00457	SAMN10436270	PRJNA475751	SRR8198830	Pseudomonas
PSA00458	SAMN10436271	PRJNA475751	SRR8198831	Pseudomonas
PSA00459	SAMN10436272	PRJNA475751	SRR8198836	Pseudomonas
PSA00461	SAMN10436273	PRJNA475751	SRR8198837	Pseudomonas
PSA00462	SAMN10436274	PRJNA475751	SRR8198834	Pseudomonas
PSA00463	SAMN10436275	PRJNA475751	SRR8198835	Pseudomonas
PSA00464	SAMN10436276	PRJNA475751	SRR8198828	Pseudomonas
PSA00466	SAMN10436278	PRJNA475751	SRR8199440	Pseudomonas
PSA00467	SAMN10436279	PRJNA475751	SRR8199439	Pseudomonas
PSA00468	SAMN10436280	PRJNA475751	SRR8199442	Pseudomonas
PSA00469	SAMN10436281	PRJNA475751	SRR8199441	Pseudomonas
PSA00470	SAMN10436282	PRJNA475751	SRR8199444	Pseudomonas
PSA00471	SAMN10436283	PRJNA475751	SRR8198827	Pseudomonas
PSA00472	SAMN10436284	PRJNA475751	SRR8199446	Pseudomonas
PSA00473	SAMN10436285	PRJNA475751	SRR8199445	Pseudomonas
PSA00474	SAMN10436286	PRJNA475751	SRR8199438	Pseudomonas
PSA00475	SAMN10436287	PRJNA475751	SRR8199437	Pseudomonas
PSA00476	SAMN10436288	PRJNA475751	SRR8198888	Pseudomonas	X
PSA00477	SAMN10436289	PRJNA475751	SRR8198882	Pseudomonas
PSA00478	SAMN10436290	PRJNA475751	SRR8198890	Pseudomonas
PSA00479	SAMN10436291	PRJNA475751	SRR8198889	Pseudomonas
PSA00481	SAMN10436293	PRJNA475751	SRR8199279	Pseudomonas
PSA00482	SAMN10436294	PRJNA475751	SRR8198823	Pseudomonas
PSA00483	SAMN10436295	PRJNA475751	SRR8199151	Pseudomonas
PSA00484	SAMN10436296	PRJNA475751	SRR8199288	Pseudomonas
PSA00486	SAMN10436297	PRJNA475751	SRR8199080	Pseudomonas
PSA00487	SAMN10436298	PRJNA475751	SRR8199084	Pseudomonas
PSA00488	SAMN10436299	PRJNA475751	SRR8199085	Pseudomonas
PSA00489	SAMN10436300	PRJNA475751	SRR8199082	Pseudomonas
PSA00490	SAMN10436301	PRJNA475751	SRR8199083	Pseudomonas
PSA00491	SAMN10436302	PRJNA475751	SRR8199291	Pseudomonas
PSA00492	SAMN10436303	PRJNA475751	SRR8199292	Pseudomonas
PSA00493	SAMN10436304	PRJNA475751	SRR8199289	Pseudomonas
PSA00494	SAMN10436305	PRJNA475751	SRR8199290	Pseudomonas
PSA00495	SAMN10436306	PRJNA475751	SRR8199337	Pseudomonas
PSA00496	SAMN10436307	PRJNA475751	SRR8198948	Pseudomonas
PSA00497	SAMN10436308	PRJNA475751	SRR8199221	Pseudomonas
PSA00498	SAMN10436309	PRJNA475751	SRR8199108	Pseudomonas
PSA00499	SAMN10436310	PRJNA475751	SRR8199494	Pseudomonas
PSA00501	SAMN10436312	PRJNA475751	SRR8199577	Pseudomonas
PSA00502	SAMN10436313	PRJNA475751	SRR8199571	Pseudomonas
PSA00503	SAMN10436314	PRJNA475751	SRR8199564	Pseudomonas
PSA00504	SAMN10436315	PRJNA475751	SRR8199244	Pseudomonas
PSA00505	SAMN10436316	PRJNA475751	SRR8199702	Pseudomonas
PSA00506	SAMN10436317	PRJNA475751	SRR8199701	Pseudomonas
PSA00507	SAMN10436318	PRJNA475751	SRR8199232	Pseudomonas
PSA00508	SAMN10436319	PRJNA475751	SRR8199236	Pseudomonas
PSA00509	SAMN10436320	PRJNA475751	SRR8199239	Pseudomonas
PSA00510	SAMN10436321	PRJNA475751	SRR8199242	Pseudomonas
PSA00511	SAMN10436322	PRJNA475751	SRR8199149	Pseudomonas
PSA00512	SAMN10436323	PRJNA475751	SRR8199179	Pseudomonas
PSA00514	SAMN10436324	PRJNA475751	SRR8199682	Pseudomonas
PSA00515	SAMN10436325	PRJNA475751	SRR8199238	Pseudomonas
PSA00516	SAMN10436326	PRJNA475751	SRR8199371	Pseudomonas
PSA00517	SAMN10436327	PRJNA475751	SRR8199101	Pseudomonas
PSA00518	SAMN10436328	PRJNA475751	SRR8199004	Pseudomonas
PSA00520	SAMN10436330	PRJNA475751	SRR8199006	Pseudomonas
PSA00521	SAMN10436331	PRJNA475751	SRR8199005	Pseudomonas
PSA00522	SAMN10436332	PRJNA475751	SRR8199008	Pseudomonas
PSA00523	SAMN10436333	PRJNA475751	SRR8199007	Pseudomonas
PSA00524	SAMN10436334	PRJNA475751	SRR8199234	Pseudomonas
PSA00525	SAMN10436335	PRJNA475751	SRR8199604	Pseudomonas
PSA00526	SAMN10436336	PRJNA475751	SRR8198970	Pseudomonas
PSA00527	SAMN10436337	PRJNA475751	SRR8198960	Pseudomonas
PSA00528	SAMN10436338	PRJNA475751	SRR8198819	Pseudomonas
PSA00529	SAMN10436339	PRJNA475751	SRR8198820	Pseudomonas
PSA00530	SAMN10436340	PRJNA475751	SRR8198815	Pseudomonas
PSA00531	SAMN10436341	PRJNA475751	SRR8198958	Pseudomonas
PSA00532	SAMN10436342	PRJNA475751	SRR8199649	Pseudomonas
PSA00533	SAMN10436343	PRJNA475751	SRR8198824	Pseudomonas
PSA00534	SAMN10436344	PRJNA475751	SRR8199153	Pseudomonas
PSA00535	SAMN10436345	PRJNA475751	SRR8198822	Pseudomonas
PSA00536	SAMN10436346	PRJNA475751	SRR8199396	Pseudomonas
PSA00537	SAMN10436347	PRJNA475751	SRR8199397	Pseudomonas
PSA00538	SAMN10436348	PRJNA475751	SRR8199161	Pseudomonas
PSA00539	SAMN10436349	PRJNA475751	SRR8199160	Pseudomonas
PSA00540	SAMN10436350	PRJNA475751	SRR8199159	Pseudomonas
PSA00541	SAMN10436351	PRJNA475751	SRR8199158	Pseudomonas
PSA00542	SAMN10436352	PRJNA475751	SRR8199157	Pseudomonas
PSA00543	SAMN10436353	PRJNA475751	SRR8199391	Pseudomonas
PSA00544	SAMN10436354	PRJNA475751	SRR8199155	Pseudomonas
PSA00545	SAMN10436355	PRJNA475751	SRR8199154	Pseudomonas
PSA00546	SAMN10436356	PRJNA475751	SRR8199094	Pseudomonas
PSA00547	SAMN10436357	PRJNA475751	SRR8199152	Pseudomonas
PSA00548	SAMN10436358	PRJNA475751	SRR8199099	Pseudomonas
PSA00550	SAMN10436360	PRJNA475751	SRR8199366	Pseudomonas
PSA00551	SAMN10436361	PRJNA475751	SRR8198797	Pseudomonas
PSA00552	SAMN10436362	PRJNA475751	SRR8198842	Pseudomonas
PSA00553	SAMN10436363	PRJNA475751	SRR8199683	Pseudomonas
PSA00554	SAMN10436364	PRJNA475751	SRR8199098	Pseudomonas
PSA00555	SAMN10436365	PRJNA475751	SRR8199566	Pseudomonas
PSA00556	SAMN10436366	PRJNA475751	SRR8199572	Pseudomonas
PSA00557	SAMN10436367	PRJNA475751	SRR8199578	Pseudomonas
PSA00558	SAMN10436368	PRJNA475751	SRR8199454	Pseudomonas
PSA00559	SAMN10436369	PRJNA475751	SRR8199453	Pseudomonas
PSA00560	SAMN10436370	PRJNA475751	SRR8199456	Pseudomonas
PSA00561	SAMN10436371	PRJNA475751	SRR8199455	Pseudomonas
PSA00562	SAMN10436372	PRJNA475751	SRR8199535	Pseudomonas
PSA00563	SAMN10436373	PRJNA475751	SRR8199449	Pseudomonas
PSA00564	SAMN10436374	PRJNA475751	SRR8199540	Pseudomonas
PSA00565	SAMN10436375	PRJNA475751	SRR8199451	Pseudomonas
PSA00566	SAMN10436376	PRJNA475751	SRR8199448	Pseudomonas
PSA00567	SAMN10436377	PRJNA475751	SRR8199447	Pseudomonas
PSA00568	SAMN10436378	PRJNA475751	SRR8198847	Pseudomonas
PSA00569	SAMN10436379	PRJNA475751	SRR8198848	Pseudomonas
PSA00571	SAMN10436381	PRJNA475751	SRR8198846	Pseudomonas
PSA00572	SAMN10436382	PRJNA475751	SRR8198843	Pseudomonas
PSA00573	SAMN10436383	PRJNA475751	SRR8198844	Pseudomonas
PSA00574	SAMN10436384	PRJNA475751	SRR8198841	Pseudomonas
PSA00575	SAMN10436385	PRJNA475751	SRR8199231	Pseudomonas
PSA00576	SAMN10436386	PRJNA475751	SRR8198839	Pseudomonas
PSA00578	SAMN10436387	PRJNA475751	SRR8198840	Pseudomonas
PSA00579	SAMN10436388	PRJNA475751	SRR8199340	Pseudomonas
PSA00582	SAMN10436389	PRJNA475751	SRR8199342	Pseudomonas
PSA00583	SAMN10436390	PRJNA475751	SRR8199344	Pseudomonas
PSA00584	SAMN10436391	PRJNA475751	SRR8199345	Pseudomonas
PSA00585	SAMN10436392	PRJNA475751	SRR8199333	Pseudomonas
PSA00586	SAMN10436393	PRJNA475751	SRR8199336	Pseudomonas
PSA00587	SAMN10436394	PRJNA475751	SRR8199648	Pseudomonas
PSA00588	SAMN10436395	PRJNA475751	SRR8199339	Pseudomonas
PSA00589	SAMN10436396	PRJNA475751	SRR8199573	Pseudomonas
PSA00591	SAMN10436397	PRJNA475751	SRR8199553	Pseudomonas
PSA00592	SAMN10436398	PRJNA475751	SRR8199684	Pseudomonas
PSA00593	SAMN10436399	PRJNA475751	SRR8199569	Pseudomonas
PSA00594	SAMN10436400	PRJNA475751	SRR8199678	Pseudomonas
PSA00600	SAMN10436406	PRJNA475751	SRR8199243	Pseudomonas
PSA00601	SAMN10436407	PRJNA475751	SRR8199220	Pseudomonas
PSA00603	SAMN10436408	PRJNA475751	SRR8199334	Pseudomonas
PSA00604	SAMN10436409	PRJNA475751	SRR8199343	Pseudomonas
PSA00605	SAMN10436410	PRJNA475751	SRR8198826	Pseudomonas
PSA00607	SAMN10436411	PRJNA475751	SRR8199335	Pseudomonas
PSA00608	SAMN10436412	PRJNA475751	SRR8199011	Pseudomonas
PSA00609	SAMN10436413	PRJNA475751	SRR8199235	Pseudomonas
PSA00610	SAMN10436414	PRJNA475751	SRR8199247	Pseudomonas
PSA00612	SAMN10436415	PRJNA475751	SRR8198858	Pseudomonas
PSA00614	SAMN10436417	PRJNA475751	SRR8198811	Pseudomonas
PSA00615	SAMN10436418	PRJNA475751	SRR8199668	Pseudomonas
PSA00616	SAMN10436419	PRJNA475751	SRR8199650	Pseudomonas
PSA00617	SAMN11285149	PRJNA475751	SRR8810362	Pseudomonas
PSA00618	SAMN11285150	PRJNA475751	SRR8810160	Pseudomonas
PSA00619	SAMN11285151	PRJNA475751	SRR8810162	Pseudomonas
PSA00620	SAMN11285152	PRJNA475751	SRR8810431	Pseudomonas	X
PSA00621	SAMN11285153	PRJNA475751	SRR8809987	Pseudomonas
PSA00622	SAMN11285154	PRJNA475751	SRR8809984	Pseudomonas
PSA00623	SAMN11285155	PRJNA475751	SRR8809985	Pseudomonas
PSA00624	SAMN11285156	PRJNA475751	SRR8810114	Pseudomonas
PSA00625	SAMN11285157	PRJNA475751	SRR8809989	Pseudomonas
PSA00626	SAMN11285158	PRJNA475751	SRR8809825	Pseudomonas
PSA00627	SAMN11285159	PRJNA475751	SRR8810161	Pseudomonas
PSA00628	SAMN11285160	PRJNA475751	SRR8809823	Pseudomonas
PSA00629	SAMN11285161	PRJNA475751	SRR8809797	Pseudomonas
PSA00631	SAMN11285163	PRJNA475751	SRR8810641	Pseudomonas
PSA00632	SAMN11285164	PRJNA475751	SRR8810573	Pseudomonas
PSA00633	SAMN11285165	PRJNA475751	SRR8809887	Pseudomonas
PSA00634	SAMN11285166	PRJNA475751	SRR8809845	Pseudomonas
PSA00635	SAMN11285167	PRJNA475751	SRR8809844	Pseudomonas
PSA00636	SAMN11285168	PRJNA475751	SRR8810516	Pseudomonas
PSA00638	SAMN11285170	PRJNA475751	SRR8809967	Pseudomonas
PSA00639	SAMN11285171	PRJNA475751	SRR8809964	Pseudomonas
PSA00641	SAMN11285173	PRJNA475751	SRR8810088	Pseudomonas
PSA00642	SAMN11285174	PRJNA475751	SRR8810489	Pseudomonas
PSA00643	SAMN11285175	PRJNA475751	SRR8810486	Pseudomonas
PSA00644	SAMN11285176	PRJNA475751	SRR8810299	Pseudomonas
PSA00645	SAMN11285177	PRJNA475751	SRR8809935	Pseudomonas
PSA00646	SAMN11285178	PRJNA475751	SRR8810083	Pseudomonas
PSA00647	SAMN11285179	PRJNA475751	SRR8810296	Pseudomonas
PSA00648	SAMN11285180	PRJNA475751	SRR8810292	Pseudomonas
PSA00649	SAMN11285181	PRJNA475751	SRR8810295	Pseudomonas
PSA00650	SAMN11285182	PRJNA475751	SRR8810278	Pseudomonas
PSA00651	SAMN11285183	PRJNA475751	SRR8810279	Pseudomonas
PSA00652	SAMN11285184	PRJNA475751	SRR8810282	Pseudomonas
PSA00653	SAMN11285185	PRJNA475751	SRR8810283	Pseudomonas
PSA00654	SAMN11285186	PRJNA475751	SRR8810274	Pseudomonas
PSA00655	SAMN11285187	PRJNA475751	SRR8810275	Pseudomonas
PSA00656	SAMN11285188	PRJNA475751	SRR8810280	Pseudomonas	X
PSA00657	SAMN11285189	PRJNA475751	SRR8810281	Pseudomonas
PSA00658	SAMN11285190	PRJNA475751	SRR8810572	Pseudomonas
PSA00659	SAMN11285191	PRJNA475751	SRR8810612	Pseudomonas
PSA00660	SAMN11285192	PRJNA475751	SRR8810426	Pseudomonas
PSA00661	SAMN11285193	PRJNA475751	SRR8810409	Pseudomonas
PSA00662	SAMN11285194	PRJNA475751	SRR8810406	Pseudomonas
PSA00663	SAMN11285195	PRJNA475751	SRR8810515	Pseudomonas
PSA00664	SAMN11285196	PRJNA475751	SRR8809946	Pseudomonas	X
PSA00665	SAMN11285197	PRJNA475751	SRR8809953	Pseudomonas
PSA00666	SAMN11285198	PRJNA475751	SRR8809952	Pseudomonas
PSA00667	SAMN11285199	PRJNA475751	SRR8810427	Pseudomonas
PSA00668	SAMN11285200	PRJNA475751	SRR8809948	Pseudomonas
PSA00669	SAMN11285201	PRJNA475751	SRR8809947	Pseudomonas
PSA00670	SAMN11285202	PRJNA475751	SRR8810018	Pseudomonas
PSA00671	SAMN11285203	PRJNA475751	SRR8810013	Pseudomonas
PSA00672	SAMN11285204	PRJNA475751	SRR8810012	Pseudomonas
PSA00673	SAMN11285205	PRJNA475751	SRR8810015	Pseudomonas
PSA00676	SAMN11285208	PRJNA475751	SRR8810177	Pseudomonas
PSA00677	SAMN11285209	PRJNA475751	SRR8810172	Pseudomonas	X
PSA00678	SAMN11285210	PRJNA475751	SRR8810490	Pseudomonas
PSA00679	SAMN11285211	PRJNA475751	SRR8810174	Pseudomonas
PSA00680	SAMN11285212	PRJNA475751	SRR8810307	Pseudomonas
PSA00681	SAMN11285213	PRJNA475751	SRR8810306	Pseudomonas
PSA00682	SAMN11285214	PRJNA475751	SRR8810301	Pseudomonas	X
PSA00683	SAMN11285215	PRJNA475751	SRR8810300	Pseudomonas
PSA00685	SAMN11285217	PRJNA475751	SRR8810498	Pseudomonas
PSA00686	SAMN11285218	PRJNA475751	SRR8810078	Pseudomonas
PSA00688	SAMN11285220	PRJNA475751	SRR8810637	Pseudomonas
PSA00689	SAMN11285221	PRJNA475751	SRR8810497	Pseudomonas
PSA00690	SAMN11285222	PRJNA475751	SRR8810478	Pseudomonas
PSA00691	SAMN11285223	PRJNA475751	SRR8810481	Pseudomonas
PSA00692	SAMN11285224	PRJNA475751	SRR8810476	Pseudomonas
PSA00693	SAMN11285225	PRJNA475751	SRR8810479	Pseudomonas
PSA00694	SAMN11285226	PRJNA475751	SRR8810474	Pseudomonas
PSA00695	SAMN11285227	PRJNA475751	SRR8810477	Pseudomonas
PSA00696	SAMN11285228	PRJNA475751	SRR8810472	Pseudomonas
PSA00697	SAMN11285229	PRJNA475751	SRR8810475	Pseudomonas
PSA00698	SAMN11285230	PRJNA475751	SRR8810473	Pseudomonas
PSB00005	SAMN10436420	PRJNA475751	SRR8198779	Pseudomonas
PSB00006	SAMN10436421	PRJNA475751	SRR8199380	Pseudomonas
PSB00007	SAMN10436422	PRJNA475751	SRR8199602	Pseudomonas
PSB00008	SAMN10436423	PRJNA475751	SRR8199588	Pseudomonas
PSB00009	SAMN10436424	PRJNA475751	SRR8199584	Pseudomonas
PSB00010	SAMN10436425	PRJNA475751	SRR8199610	Pseudomonas
PSB00012	SAMN10436427	PRJNA475751	SRR8199148	Pseudomonas
PSB00013	SAMN10436428	PRJNA475751	SRR8198955	Pseudomonas
PSB00014	SAMN10436429	PRJNA475751	SRR8198967	Pseudomonas
PSB00015	SAMN10436430	PRJNA475751	SRR8199685	Pseudomonas
PSB00016	SAMN10436431	PRJNA475751	SRR8198994	Pseudomonas
PSB00017	SAMN10436432	PRJNA475751	SRR8199703	Pseudomonas
PSB00018	SAMN10436433	PRJNA475751	SRR8199040	Pseudomonas
PSB00019	SAMN10436434	PRJNA475751	SRR8199332	Pseudomonas
PSB00020	SAMN10436435	PRJNA475751	SRR8199071	Pseudomonas
PSB00021	SAMN11285232	PRJNA475751	SRR8809926	Pseudomonas
PSB00022	SAMN11285233	PRJNA475751	SRR8810503	Pseudomonas
SER00032	SAMN10437092	PRJNA475751	SRR8201214	Serratia
SER00035	SAMN10437093	PRJNA475751	SRR8201213	Serratia
SER00039	SAMN10437094	PRJNA475751	SRR8201216	Serratia
SER00040	SAMN10437095	PRJNA475751	SRR8201215	Serratia
SER00041	SAMN10437096	PRJNA475751	SRR8201218	Serratia
SER00042	SAMN10437097	PRJNA475751	SRR8201217	Serratia
SER00043	SAMN10437098	PRJNA475751	SRR8201220	Serratia
SER00044	SAMN10437099	PRJNA475751	SRR8201219	Serratia
SER00045	SAMN10437100	PRJNA475751	SRR8201222	Serratia
SER00046	SAMN10437101	PRJNA475751	SRR8201221	Serratia
SER00047	SAMN10437102	PRJNA475751	SRR8200921	Serratia
SER00048	SAMN10437103	PRJNA475751	SRR8200903	Serratia
SER00049	SAMN10437104	PRJNA475751	SRR8200919	Serratia
SER00050	SAMN10437105	PRJNA475751	SRR8200918	Serratia
SER00051	SAMN10437106	PRJNA475751	SRR8200925	Serratia
SER00052	SAMN10437107	PRJNA475751	SRR8200924	Serratia
SER00053	SAMN10437108	PRJNA475751	SRR8200923	Serratia
SER00054	SAMN10437109	PRJNA475751	SRR8200922	Serratia
SER00055	SAMN10437110	PRJNA475751	SRR8200916	Serratia
SER00056	SAMN10437111	PRJNA475751	SRR8200915	Serratia
SER00057	SAMN10437112	PRJNA475751	SRR8201289	Serratia	X
SER00058	SAMN10437113	PRJNA475751	SRR8201290	Serratia	X
SER00059	SAMN10437114	PRJNA475751	SRR8201287	Serratia
SER00060	SAMN10437115	PRJNA475751	SRR8201288	Serratia
SER00061	SAMN10437116	PRJNA475751	SRR8201293	Serratia
SER00062	SAMN11285234	PRJNA475751	SRR8810179	Serratia
SER00063	SAMN10437117	PRJNA475751	SRR8201294	Serratia
SER00064	SAMN10437118	PRJNA475751	SRR8201291	Serratia
SER00065	SAMN10437119	PRJNA475751	SRR8201292	Serratia
SER00066	SAMN10437120	PRJNA475751	SRR8201295	Serratia	X
SER00067	SAMN10437121	PRJNA475751	SRR8201296	Serratia
SER00068	SAMN10437122	PRJNA475751	SRR8201157	Serratia
SER00069	SAMN10437123	PRJNA475751	SRR8201156	Serratia
SER00070	SAMN10437124	PRJNA475751	SRR8201159	Serratia
SER00072	SAMN10437125	PRJNA475751	SRR8201158	Serratia
SER00074	SAMN10437126	PRJNA475751	SRR8201161	Serratia
SER00077	SAMN10437127	PRJNA475751	SRR8201160	Serratia
SER00079	SAMN10437129	PRJNA475751	SRR8201162	Serratia
SER00080	SAMN10437130	PRJNA475751	SRR8201165	Serratia
SER00081	SAMN10437131	PRJNA475751	SRR8201164	Serratia
SER00082	SAMN10437132	PRJNA475751	SRR8201003	Serratia
SER00084	SAMN10437134	PRJNA475751	SRR8201005	Serratia
SER00085	SAMN10437135	PRJNA475751	SRR8201006	Serratia
SER00086	SAMN10437136	PRJNA475751	SRR8201007	Serratia
SER00087	SAMN10437137	PRJNA475751	SRR8201008	Serratia
SER00089	SAMN10437138	PRJNA475751	SRR8201009	Serratia
SER00090	SAMN10437139	PRJNA475751	SRR8201010	Serratia	X
SER00091	SAMN10437140	PRJNA475751	SRR8200901	Serratia
SER00092	SAMN10437141	PRJNA475751	SRR8200902	Serratia
SER00093	SAMN10437142	PRJNA475751	SRR8200879	Serratia
SER00094	SAMN10437143	PRJNA475751	SRR8200878	Serratia	X
SER00095	SAMN10437144	PRJNA475751	SRR8201040	Serratia
SER00096	SAMN10437145	PRJNA475751	SRR8201042	Serratia
SER00097	SAMN10437146	PRJNA475751	SRR8200875	Serratia
SER00098	SAMN10437147	PRJNA475751	SRR8200874	Serratia
SER00099	SAMN10437148	PRJNA475751	SRR8200873	Serratia
SER00100	SAMN10437149	PRJNA475751	SRR8200872	Serratia
SER00101	SAMN10437150	PRJNA475751	SRR8201037	Serratia
SER00102	SAMN10437151	PRJNA475751	SRR8201067	Serratia
SER00104	SAMN10437153	PRJNA475751	SRR8201245	Serratia
SER00105	SAMN10437154	PRJNA475751	SRR8201242	Serratia
SER00106	SAMN10437155	PRJNA475751	SRR8201243	Serratia
SER00107	SAMN10437156	PRJNA475751	SRR8201240	Serratia
SER00108	SAMN10437157	PRJNA475751	SRR8201241	Serratia
SER00109	SAMN10437158	PRJNA475751	SRR8201238	Serratia
SER00110	SAMN10437159	PRJNA475751	SRR8201239	Serratia
SER00111	SAMN10437160	PRJNA475751	SRR8201236	Serratia	X
SER00116	SAMN10437162	PRJNA475751	SRR8201113	Serratia
SER00117	SAMN10437163	PRJNA475751	SRR8201112	Serratia	X
SER00118	SAMN10437164	PRJNA475751	SRR8201115	Serratia
SER00119	SAMN10437165	PRJNA475751	SRR8201114	Serratia	X
SER00120	SAMN10437166	PRJNA475751	SRR8201109	Serratia
SER00121	SAMN10437167	PRJNA475751	SRR8201108	Serratia
SER00122	SAMN10437168	PRJNA475751	SRR8201111	Serratia
SER00123	SAMN10437169	PRJNA475751	SRR8201110	Serratia
SER00124	SAMN10437170	PRJNA475751	SRR8201107	Serratia
SER00125	SAMN10437171	PRJNA475751	SRR8201106	Serratia
SER00129	SAMN10437172	PRJNA475751	SRR8200968	Serratia
SER00130	SAMN10437173	PRJNA475751	SRR8200969	Serratia
SER00132	SAMN10437175	PRJNA475751	SRR8200971	Serratia
SER00134	SAMN10437176	PRJNA475751	SRR8200964	Serratia
SER00135	SAMN10437177	PRJNA475751	SRR8200965	Serratia
SER00136	SAMN10437178	PRJNA475751	SRR8201038	Serratia
SER00138	SAMN10437180	PRJNA475751	SRR8201035	Serratia
SER00139	SAMN10437181	PRJNA475751	SRR8201036	Serratia
SER00140	SAMN10437182	PRJNA475751	SRR8200954	Serratia
SER00141	SAMN10437183	PRJNA475751	SRR8200900	Serratia
SER00142	SAMN10437184	PRJNA475751	SRR8201020	Serratia
SER00143	SAMN10437185	PRJNA475751	SRR8201019	Serratia
SER00144	SAMN10437186	PRJNA475751	SRR8201034	Serratia
SER00145	SAMN10437187	PRJNA475751	SRR8201033	Serratia
SER00146	SAMN10437188	PRJNA475751	SRR8201032	Serratia
SER00147	SAMN11285235	PRJNA475751	SRR8810421	Serratia
SER00148	SAMN11285236	PRJNA475751	SRR8810154	Serratia
SER00149	SAMN11285237	PRJNA475751	SRR8809831	Serratia
SER00150	SAMN11285238	PRJNA475751	SRR8810341	Serratia
SER00151	SAMN11285239	PRJNA475751	SRR8810340	Serratia
SER00153	SAMN11285240	PRJNA475751	SRR8810639	Serratia
SER00154	SAMN11285241	PRJNA475751	SRR8810347	Serratia	X
SER00155	SAMN11285242	PRJNA475751	SRR8810346	Serratia
SER00156	SAMN11285243	PRJNA475751	SRR8810349	Serratia
SER00157	SAMN11285244	PRJNA475751	SRR8810348	Serratia
SER00158	SAMN11285245	PRJNA475751	SRR8810345	Serratia
SER00159	SAMN11285246	PRJNA475751	SRR8810344	Serratia
SER00160	SAMN11285247	PRJNA475751	SRR8809760	Serratia
SER00161	SAMN11285248	PRJNA475751	SRR8809965	Serratia
SER00162	SAMN11285249	PRJNA475751	SRR8809765	Serratia
SER00163	SAMN11285250	PRJNA475751	SRR8809761	Serratia
SER00164	SAMN11285251	PRJNA475751	SRR8810487	Serratia
SER00165	SAMN11285252	PRJNA475751	SRR8809759	Serratia
SER00167	SAMN11285254	PRJNA475751	SRR8810549	Serratia
SER00168	SAMN11285255	PRJNA475751	SRR8810492	Serratia
SER00169	SAMN11285256	PRJNA475751	SRR8810537	Serratia
SER00170	SAMN11285257	PRJNA475751	SRR8809957	Serratia
SER00171	SAMN11285258	PRJNA475751	SRR8810370	Serratia
SER00172	SAMN11285259	PRJNA475751	SRR8810365	Serratia
SER00174	SAMN11285261	PRJNA475751	SRR8810145	Serratia
SER00175	SAMN11285262	PRJNA475751	SRR8810358	Serratia
SER00176	SAMN11285263	PRJNA475751	SRR8809961	Serratia
SER00178	SAMN11285264	PRJNA475751	SRR8809753	Serratia
SER00179	SAMN11285265	PRJNA475751	SRR8809754	Serratia
SER00180	SAMN11285266	PRJNA475751	SRR8810410	Serratia
SER00181	SAMN11285267	PRJNA475751	SRR8810417	Serratia
SER00182	SAMN11285268	PRJNA475751	SRR8810416	Serratia
SER00183	SAMN11285269	PRJNA475751	SRR8810415	Serratia
SER00184	SAMN11285270	PRJNA475751	SRR8810407	Serratia
SER00185	SAMN11285271	PRJNA475751	SRR8810413	Serratia
SER00186	SAMN11285272	PRJNA475751	SRR8810412	Serratia
SER00187	SAMN11285273	PRJNA475751	SRR8810411	Serratia
SER00188	SAMN11285274	PRJNA475751	SRR8809901	Serratia
SER00189	SAMN11285275	PRJNA475751	SRR8809902	Serratia
STEN00020	SAMN10437189	PRJNA475751	SRR8201031	Stenotrophomonas
STEN00021	SAMN10437190	PRJNA475751	SRR8201232	Stenotrophomonas
STEN00025	SAMN10437191	PRJNA475751	SRR8201231	Stenotrophomonas
STEN00027	SAMN10437192	PRJNA475751	SRR8201266	Stenotrophomonas
STEN00028	SAMN10437193	PRJNA475751	SRR8201267	Stenotrophomonas
STEN00030	SAMN10437194	PRJNA475751	SRR8201264	Stenotrophomonas	X
STEN00031	SAMN10437195	PRJNA475751	SRR8201265	Stenotrophomonas
STEN00032	SAMN10437196	PRJNA475751	SRR8201270	Stenotrophomonas
STEN00033	SAMN10437197	PRJNA475751	SRR8201271	Stenotrophomonas
STEN00034	SAMN10437198	PRJNA475751	SRR8201268	Stenotrophomonas
STEN00036	SAMN10437200	PRJNA475751	SRR8201262	Stenotrophomonas
STEN00037	SAMN10437201	PRJNA475751	SRR8201263	Stenotrophomonas
STEN00038	SAMN10437202	PRJNA475751	SRR8200945	Stenotrophomonas
STEN00041	SAMN10437203	PRJNA475751	SRR8200944	Stenotrophomonas
STEN00042	SAMN10437204	PRJNA475751	SRR8200947	Stenotrophomonas
STEN00043	SAMN10437205	PRJNA475751	SRR8200946	Stenotrophomonas	X
STEN00044	SAMN10437206	PRJNA475751	SRR8200949	Stenotrophomonas
STEN00045	SAMN10437207	PRJNA475751	SRR8200948	Stenotrophomonas	X
STEN00046	SAMN10437208	PRJNA475751	SRR8200951	Stenotrophomonas
STEN00047	SAMN10437209	PRJNA475751	SRR8200950	Stenotrophomonas
STEN00048	SAMN10437210	PRJNA475751	SRR8200943	Stenotrophomonas
STEN00049	SAMN10437211	PRJNA475751	SRR8200942	Stenotrophomonas
STEN00050	SAMN10437212	PRJNA475751	SRR8201021	Stenotrophomonas
STEN00051	SAMN10437213	PRJNA475751	SRR8201022	Stenotrophomonas	X
STEN00052	SAMN10437214	PRJNA475751	SRR8201023	Stenotrophomonas
STEN00053	SAMN10437215	PRJNA475751	SRR8201024	Stenotrophomonas
STEN00054	SAMN10437216	PRJNA475751	SRR8201025	Stenotrophomonas
STEN00056	SAMN10437218	PRJNA475751	SRR8201027	Stenotrophomonas
STEN00057	SAMN10437219	PRJNA475751	SRR8201028	Stenotrophomonas
STEN00058	SAMN10437220	PRJNA475751	SRR8201029	Stenotrophomonas	X
STEN00059	SAMN10437221	PRJNA475751	SRR8201030	Stenotrophomonas	X
STEN00060	SAMN10437222	PRJNA475751	SRR8201141	Stenotrophomonas
STEN00061	SAMN10437223	PRJNA475751	SRR8201140	Stenotrophomonas	X
STEN00062	SAMN10437224	PRJNA475751	SRR8201139	Stenotrophomonas
STEN00063	SAMN10437225	PRJNA475751	SRR8201138	Stenotrophomonas
STEN00064	SAMN10437226	PRJNA475751	SRR8201137	Stenotrophomonas
STEN00065	SAMN10437227	PRJNA475751	SRR8201136	Stenotrophomonas
STEN00066	SAMN10437228	PRJNA475751	SRR8201135	Stenotrophomonas
STEN00068	SAMN10437229	PRJNA475751	SRR8201134	Stenotrophomonas
STEN00069	SAMN10437230	PRJNA475751	SRR8201133	Stenotrophomonas	X
STEN00070	SAMN10437231	PRJNA475751	SRR8201132	Stenotrophomonas
STEN00072	SAMN10437233	PRJNA475751	SRR8201206	Stenotrophomonas
STEN00073	SAMN10437234	PRJNA475751	SRR8201203	Stenotrophomonas
STEN00074	SAMN10437235	PRJNA475751	SRR8201204	Stenotrophomonas
STEN00075	SAMN10437236	PRJNA475751	SRR8201201	Stenotrophomonas
STEN00076	SAMN10437237	PRJNA475751	SRR8201202	Stenotrophomonas
STEN00077	SAMN10437238	PRJNA475751	SRR8201199	Stenotrophomonas
STEN00078	SAMN10437239	PRJNA475751	SRR8201200	Stenotrophomonas
STEN00080	SAMN10437240	PRJNA475751	SRR8201207	Stenotrophomonas
STEN00081	SAMN10437241	PRJNA475751	SRR8201208	Stenotrophomonas
STEN00082	SAMN10437242	PRJNA475751	SRR8200893	Stenotrophomonas	X
STEN00083	SAMN10437243	PRJNA475751	SRR8200892	Stenotrophomonas
STEN00084	SAMN10437244	PRJNA475751	SRR8200895	Stenotrophomonas
STEN00085	SAMN10437245	PRJNA475751	SRR8200894	Stenotrophomonas
STEN00086	SAMN10437246	PRJNA475751	SRR8200889	Stenotrophomonas
STEN00087	SAMN10437247	PRJNA475751	SRR8200888	Stenotrophomonas
STEN00088	SAMN10437248	PRJNA475751	SRR8200891	Stenotrophomonas
STEN00089	SAMN10437249	PRJNA475751	SRR8200890	Stenotrophomonas
STEN00090	SAMN10437250	PRJNA475751	SRR8200897	Stenotrophomonas
STEN00091	SAMN10437251	PRJNA475751	SRR8200896	Stenotrophomonas
STEN00092	SAMN11285276	PRJNA475751	SRR8810323	Stenotrophomonas
STEN00095	SAMN10437252	PRJNA475751	SRR8200979	Stenotrophomonas
STEN00096	SAMN11285277	PRJNA475751	SRR8810356	Stenotrophomonas
STEN00097	SAMN11285278	PRJNA475751	SRR8809954	Stenotrophomonas
STEN00098	SAMN10437253	PRJNA475751	SRR8200980	Stenotrophomonas
STEN00099	SAMN11285279	PRJNA475751	SRR8809846	Stenotrophomonas
STEN00100	SAMN11285280	PRJNA475751	SRR8810243	Stenotrophomonas	X
STEN00136	SAMN11285281	PRJNA475751	SRR8809748	Stenotrophomonas
STEN00137	SAMN11285282	PRJNA475751	SRR8809774	Stenotrophomonas	X
STEN00138	SAMN11285283	PRJNA475751	SRR8810587	Stenotrophomonas
STEN00139	SAMN11285284	PRJNA475751	SRR8810294	Stenotrophomonas
STEN00140	SAMN10437254	PRJNA475751	SRR8200981	Stenotrophomonas
STEN00141	SAMN11285285	PRJNA475751	SRR8810239	Stenotrophomonas
STEN00142	SAMN11285286	PRJNA475751	SRR8810317	Stenotrophomonas
STEN00143	SAMN11285287	PRJNA475751	SRR8810318	Stenotrophomonas	X
STEN00144	SAMN11285288	PRJNA475751	SRR8809801	Stenotrophomonas
STEN00145	SAMN11285289	PRJNA475751	SRR8809804	Stenotrophomonas
STEN00146	SAMN11285290	PRJNA475751	SRR8810314	Stenotrophomonas
STEN00147	SAMN11285291	PRJNA475751	SRR8809758	Stenotrophomonas
STEN00148	SAMN10437255	PRJNA475751	SRR8200982	Stenotrophomonas
STEN00149	SAMN10437256	PRJNA475751	SRR8200975	Stenotrophomonas
STEN00151	SAMN10437257	PRJNA475751	SRR8200976	Stenotrophomonas
STEN00152	SAMN11285292	PRJNA475751	SRR8810260	Stenotrophomonas
STEN00155	SAMN10437258	PRJNA475751	SRR8200977	Stenotrophomonas
STEN00158	SAMN11285293	PRJNA475751	SRR8810255	Stenotrophomonas
STEN00159	SAMN11285294	PRJNA475751	SRR8810258	Stenotrophomonas
STEN00160	SAMN11285295	PRJNA475751	SRR8810539	Stenotrophomonas
VRE32487	SAMN09401110	PRJNA475751	SRR7297037	Enterococcus
VRE32488	SAMN09401111	PRJNA475751	SRR7297034	Enterococcus
VRE32489	SAMN09401112	PRJNA475751	SRR7297035	Enterococcus	X
VRE32490	SAMN09401113	PRJNA475751	SRR7297032	Enterococcus
VRE32491	SAMN09401114	PRJNA475751	SRR7297033	Enterococcus
VRE32492	SAMN09401115	PRJNA475751	SRR7297030	Enterococcus
VRE32493	SAMN09401116	PRJNA475751	SRR7297031	Enterococcus
VRE32494	SAMN09401117	PRJNA475751	SRR7297028	Enterococcus
VRE32495	SAMN09401118	PRJNA475751	SRR7297029	Enterococcus
VRE32496	SAMN09401119	PRJNA475751	SRR7297641	Enterococcus
VRE32499	SAMN09401120	PRJNA475751	SRR7297640	Enterococcus
VRE32503	SAMN09401121	PRJNA475751	SRR7297643	Enterococcus
VRE32504	SAMN09401122	PRJNA475751	SRR7297642	Enterococcus
VRE32505	SAMN09401123	PRJNA475751	SRR7297637	Enterococcus
VRE32506	SAMN09401124	PRJNA475751	SRR7297636	Enterococcus
VRE32507	SAMN09401125	PRJNA475751	SRR7297639	Enterococcus
VRE32509	SAMN09401126	PRJNA475751	SRR7297638	Enterococcus
VRE32510	SAMN09401127	PRJNA475751	SRR7297633	Enterococcus
VRE32511	SAMN09401128	PRJNA475751	SRR7297632	Enterococcus
VRE32513	SAMN09401129	PRJNA475751	SRR7297608	Enterococcus
VRE32514	SAMN09401130	PRJNA475751	SRR7297609	Enterococcus
VRE32515	SAMN09401131	PRJNA475751	SRR7297610	Enterococcus
VRE32517	SAMN09401133	PRJNA475751	SRR7297612	Enterococcus
VRE32518	SAMN09401134	PRJNA475751	SRR7297613	Enterococcus
VRE32519	SAMN09401135	PRJNA475751	SRR7297614	Enterococcus
VRE32520	SAMN09401136	PRJNA475751	SRR7297615	Enterococcus
VRE32521	SAMN09401137	PRJNA475751	SRR7297616	Enterococcus
VRE32522	SAMN09401138	PRJNA475751	SRR7297617	Enterococcus
[truncated: 175 more rows]
