# Supplementary material for: Systematic detection of horizontal gene transfer across genera among multidrug-resistant bacteria in a single hospital
Source: eLife. 2020 Apr 14;9:e53886. doi: 10.7554/eLife.53886 (PMC7156236; doi:10.7554/eLife.53886)
Supplement: Supplementary file 2. [file elife-53886-supp2.xlsx]

## Sheet: Sheet1
Supplementary File 2. Genus distribution and gene content of shared sequence clusters
Cluster	# Genomes	Length Range (bp)	CD	STA	ENT	PSA	STEN	ACIN	PRO	SER	CB	EC	KL	Probably MGE Type (NCBI BLAST)	Mobile element marker genes	Antimicrobial resistance genes	Metal interaction genes
1	42	5217-12028								1	2	6	33	Gram-negative plasmid	Tn3 transposon resolvase	CTX-M-36, bla-TEM-91, neo, sul2, aph(6)-Id
2	52	5217-7083								1	2		49	Gram-negative plasmid	tyrosine recombinase XerD	dfrA14
3	29	5204-9767									1	14	14	Gram-negative plasmid	serine recombinase PinR	tetA, tetR
4	23	5164-9330								1	3	2	17	Gram-negative plasmid	ColRNAI replicon
5	10	5327-9460									7	1	2	Gram-negative plasmid	ColRNAI replicon
6	8	5167-23108				4	4							ICE	Soj chromosome partitioner, traG, T4SS cassette, virB4
7	10	5765-42843								1	1		8	Gram-negative plasmid	Hin DNA invertase		Arsenic resistance operon, copper resistance operon, cation efflux operon, silver binding
8	7	5743-18033	2	1	4									Gram-positive transposon	Tn916 transposase, FtsK DNA translocase	tetM
9	10	5115-5298	1		9									Gram-positive plasmid/ICE		aad(6), aph(3')-IIIa, SAT-4
10	3	5188-28860										2	1	Gram-negative plasmid	IncFIB(pQil) replicon, RepA, ParM segregation protein, T4SS cassette, tyrosine recombinase
11	6	6110-7050									2	3	1	Gram-negative plasmid	IS6-like IS6100 family transposase	mrx, mphA	Chromate transport genes
12	4	7769-9333										2	2	Gram-negative plasmid	TraI/TraD conjugal transport genes
13	5	5083-5230										4	1	Gram-negative plasmid	Tn7 transposase		Mercury transport operon
14	5	8456				4							1	Gram-negative plasmid	DNA helicase PcrA, DNA repair protein RecF
15	4	26638-27826							3			1		ICE	InsA transposase, conjugal transfer protein traD, TIGR03756 integrating conjugative element proteins	tetD
16	5	10282-13817				2	3							ICE	Prophage integrase IntS, Spo0C chromosome partitioner
17	5	14066-14067						1	3			1		Gram-negative transposon	Tn7 transposase, tyrosine recombinase	dfrA, sat2, aadA1
18	3	25858-33656									2		1	Gram-negative plasmid	IncN replicon, TraI/traD conjugal transport, type IV secretion system, Tn552 DNA invertase
19	4	10566-10887								2			2	Gram-negative plasmid			Arsenic resistance operon
20	4	10884				2	2							ICE		MacA/AcrB efflux pump
21	4	6801-6865				3	1							ICE			Cus sensor kinase, copper resistance genes
22	4	5364				1	3							ICE	Vir2D relaxase
23	3	5756									1	2		Gram-negative plasmid
24	3	9503									1		2	Gram-negative plasmid	Smc chromosome-partitioning protein		Nickel/cobalt efflux
25	3	5837									2	1		Gram-negative plasmid
26	3	8294-8314								1	1	1		Gram-negative plasmid	IS5 family transposase, IS1 family transposase
27	3	16023-16025									1		2	Gram-negative plasmid	DNA helicase YjcD
28	3	5615								2			1	Gram-negative plasmid	Tn3 family transposase
29	3	8248		2	1									Gram-positive transposon	VirB4 component-like protein, Tn3-like ATPase
30	3	7407-8903				2				1				ICE	Prophage integrase IntS
31	3	16885				2	1							Gram-negative plasmid	T4SS genes, TraG conjugal transfer
32	3	5267									1		2	Gram-negative plasmid	Tn3 family transposase
33	2	5103									1		1	Gram-negative plasmid	Transposase	qnrB20
34	2	5268									1		1	Gram-negative plasmid	Tn3 resolvase		Arsenic resistance operon
35	2	62902										1	1	Gram-negative plasmid	IncFII replicon, Tn552 transposase, TraS/TraD, DNA relaxosome, tyrosine recombinase	bla-KPC-3
36	2	13608									1		1	Gram-negative plasmid	SpoC chromosome-partitioning protein, plasmid-derived ssDNA binding protein
37	2	5698									1		1	Gram-negative plasmid
38	2	30605							1			1		ICE	RpnD recombination nuclease, DNA helicase, topoisomerase
39	2	5446									1		1	Gram-negative plasmid	MbeA/C DNA relaxase/mobilization gene
40	2	7000								1	1			Gram-negative plasmid	Mobile element protein	bla-TEM-91, yokD, aac(3)-iia
41	2	18336								1	1			Gram-negative plasmid	T4SS genes
42	2	18398									1		1	Gram-negative plasmid
43	2	7206	1		1									Gram-positive transposon
44	2	5716	1		1									ICE	Type IV secretion system proteins
45	2	5335	1		1									ICE	Soj chromosome-partitioning protein	ermB
46	2	21044									1		1	Gram-negative plasmid	IncHI2 replicon
47	2	56477				1	1							ICE	Topoisomerase
48	2	20367				1	1							ICE	Tn21/Tn501-like transposon, conjugative transfer proteins		Mercury binding operon
49	2	8171				1	1							Gram-negative plasmid	Vir2D relaxase
50	2	6073				1	1							ICE	Topoisomerase
51	2	5864				1	1							Gram-negative plasmid	Soj chromosome-partitioning protein
CD = Clostridioides; STA = Staphylococcus; ENT = Enterococcus; PSA = Pseudomonas; STEN = Stenotrophomonas; ACIN = Acinetobacter; PRO = Proteus; SER = Serratia; CB = Citrobacter; KP = Klebsiella; EC = Escherichia
ICE = Integrated Conjugative Element
