# Supplementary material for: Systematic detection of horizontal gene transfer across genera among multidrug-resistant bacteria in a single hospital
Source: eLife. 2020 Apr 14;9:e53886. doi: 10.7554/eLife.53886 (PMC7156236; doi:10.7554/eLife.53886)
Supplement: Supplementary file 3. [file elife-53886-supp3.xlsx]

## Sheet: Sheet1
Supplementary File 3. Accession information for hybrid assembled genomes
Isolate ID	Accession	BioProject
ACIN00156	SAMN14265976	PRJNA609916
CB00017	SAMN14265977	PRJNA609916
CB00028	SAMN14265978	PRJNA609916
CD07814	SAMN14265979	PRJNA609916
EC00609	SAMN14265980	PRJNA609916
EC00668	SAMN14265981	PRJNA609916
EC00678	SAMN14265982	PRJNA609916
EC00690	SAMN14265983	PRJNA609916
EC00701	SAMN14265984	PRJNA609916
KLP00149	SAMN14265985	PRJNA609916
KLP00155	SAMN14265986	PRJNA609916
KLP00161	SAMN14265987	PRJNA609916
KLP00177	SAMN14265988	PRJNA609916
KLP00182	SAMN14265989	PRJNA609916
KLP00187	SAMN14265990	PRJNA609916
KLP00213	SAMN14265991	PRJNA609916
KLP00215	SAMN14265992	PRJNA609916
KLP00218	SAMN14265993	PRJNA609916
KLP00221	SAMN14265994	PRJNA609916
SER00066	SAMN14265995	PRJNA609916
SER00094	SAMN14265996	PRJNA609916
VRE32524	SAMN14265997	PRJNA609916
