# Supplementary material for: Systematic detection of horizontal gene transfer across genera among multidrug-resistant bacteria in a single hospital
Source: eLife. 2020 Apr 14;9:e53886. doi: 10.7554/eLife.53886 (PMC7156236; doi:10.7554/eLife.53886)
Supplement: Supplementary file 4. [file elife-53886-supp4.xlsx]

## Sheet: Sheet1
Supplementary File 4. Plasmid coverage among all isolates with >90% coverage of at least one plasmid
Isolate ID	pKLP00149_2	pEC000690_2	pKLP00221_2	pKLP00161_2	pKLP00182_2	pKLP00177_3	pKLP00218_2	pKLP00155_6	pCB00017_2	pKLP00215_4
CB00008	0.005	0.108	0.034	0.008	0.005	0	0.006	0.979	0.005	0
CB00014	0	0.094	0.032	0	0.001	0	0	0.979	0	0
CB00016	0	0.094	0.032	0	0.001	0	0	0.979	0	0
CB00017	0.303	0.147	0.473	0.703	0.103	0.825	0.826	0	1	0.327
CB00028	0.163	0.057	0.225	0.289	0.911	0.35	0.288	0	0.318	0.027
CB00057	0	0.094	0.032	0	0.001	0	0	0.979	0	0
CB00061	0	0.094	0.037	0	0.008	0	0	0.979	0	0
CB00063	0	0.094	0.032	0	0.001	0	0	0.979	0	0
CB00073	0	0.094	0.032	0	0.001	0	0	0.979	0	0
CB00081	0	0.094	0.036	0	0	0	0	0.979	0	0
CB00082	0	0.094	0.032	0	0.001	0	0	0.979	0	0
CB00083	0	0.094	0.036	0	0	0	0	0.979	0	0
CB00084	0	0.094	0.032	0	0.001	0	0	0.979	0	0
EC00593	0.033	0.361	0.089	0.068	0.03	0.048	0.027	0.979	0.049	0.011
EC00599	0.065	0.999	0.132	0.159	0.045	0.165	0.086	0	0.176	0.04
EC00602	0.059	0.966	0.131	0.146	0.039	0.143	0.089	0	0.157	0.04
EC00606	0.085	0.458	0.144	0.105	0.042	0.08	0.079	0.979	0.091	0.026
EC00620	0.065	1	0.132	0.16	0.045	0.166	0.087	0	0.177	0.04
EC00628	0.064	1	0.133	0.162	0.045	0.165	0.089	0	0.176	0.04
EC00648	0.089	0.929	0.139	0.139	0.045	0.14	0.103	0	0.155	0.053
EC00678	0.346	0.053	0.286	0.184	0.016	0.246	0.169	0.022	0.248	1
EC00690	0.094	1	0.141	0.168	0.051	0.181	0.103	0	0.19	0.053
EC00692	0.065	0.993	0.131	0.16	0.045	0.166	0.087	0	0.177	0.04
EC00697	0.065	0.997	0.131	0.16	0.045	0.166	0.086	0	0.177	0.041
EC00701	0.366	0.526	0.332	0.197	0.031	0.239	0.185	1	0.244	0.979
KLO00010	0.267	0.147	0.49	0.8	0.11	0.742	0.996	0	0.829	0.237
KLO00013	0.26	0.147	0.388	0.547	0.107	0.995	0.598	0	0.729	0.305
KLO00017	0.28	0.147	0.586	0.984	0.093	0.762	1	0	0.863	0.25
KLP00149	1	0.095	0.204	0.212	0.078	0.283	0.243	0	0.273	0.467
KLP00155	0.429	0.145	0.896	0.674	0.066	0.664	0.721	1	0.674	0.629
KLP00156	0.999	0.095	0.206	0.215	0.079	0.283	0.247	0	0.276	0.467
KLP00157	1	0.095	0.204	0.212	0.078	0.283	0.243	0	0.273	0.467
KLP00158	0.317	0.145	0.998	0.607	0.062	0.538	0.642	1	0.61	0.481
KLP00161	0.304	0.199	0.581	0.998	0.098	0.74	0.994	0	0.841	0.25
KLP00164	0.996	0.095	0.206	0.212	0.076	0.278	0.244	0	0.272	0.467
KLP00166	0.307	0.199	0.583	0.996	0.106	0.783	0.996	0	0.878	0.25
KLP00167	0.472	0.145	0.917	0.678	0.064	0.662	0.728	1	0.678	0.599
KLP00170	0.977	0.277	0.206	0.237	0.083	0.311	0.245	0	0.301	0.439
KLP00172	0.286	0.14	0.986	0.615	0.065	0.525	0.643	1	0.608	0.559
KLP00174	0.316	0.144	0.994	0.606	0.062	0.52	0.641	1	0.609	0.483
KLP00175	0.316	0.144	0.997	0.612	0.064	0.524	0.647	1	0.614	0.482
KLP00177	0.267	0.185	0.362	0.541	0.098	1	0.598	0	0.729	0.307
KLP00178	0.788	0.13	0.677	0.516	0.094	0.603	0.632	0.979	0.669	0.565
KLP00180	0.305	0.199	0.583	0.998	0.098	0.768	0.997	0	0.866	0.25
KLP00182	0.189	0.109	0.092	0.182	1	0.245	0.159	0	0.22	0.027
KLP00183	0.305	0.199	0.583	0.998	0.098	0.768	0.997	0	0.866	0.25
KLP00184	0.984	0.093	0.199	0.214	0.075	0.281	0.248	0	0.274	0.457
KLP00185	0.307	0.199	0.585	0.999	0.107	0.784	0.999	0	0.88	0.25
KLP00187	0.33	0.199	0.528	0.729	0.111	0.825	0.826	0	1	0.327
KLP00188	0.29	0.117	0.518	0.759	0.086	0.702	0.995	0.979	0.791	0.236
KLP00190	0.267	0.185	0.362	0.541	0.098	1	0.598	0	0.729	0.305
KLP00191	0.977	0.095	0.205	0.212	0.078	0.278	0.244	0	0.272	0.439
KLP00192	0.977	0.095	0.205	0.212	0.076	0.278	0.244	0	0.272	0.439
KLP00193	0.79	0.095	0.234	0.178	0.081	0.267	0.186	0.979	0.263	0.458
KLP00194	0.996	0.095	0.206	0.212	0.076	0.278	0.244	0	0.272	0.467
KLP00195	1	0.095	0.207	0.213	0.077	0.279	0.244	0	0.273	0.467
KLP00196	0.997	0.121	0.218	0.225	0.088	0.295	0.244	0	0.293	0.491
KLP00198	0.294	0.185	0.362	0.542	0.098	1	0.599	0	0.729	0.305
KLP00199	0.267	0.185	0.362	0.541	0.098	0.975	0.598	0	0.707	0.31
KLP00200	0.996	0.095	0.206	0.212	0.076	0.278	0.244	0	0.272	0.467
KLP00201	0.317	0.145	0.985	0.617	0.073	0.553	0.643	0.85	0.622	0.483
KLP00202	0.996	0.095	0.206	0.212	0.076	0.278	0.244	0	0.272	0.467
KLP00203	0.3	0.199	0.364	0.546	0.109	0.985	0.6	0	0.735	0.307
KLP00204	0.461	0.145	0.763	0.632	0.059	0.644	0.716	1	0.661	0.596
KLP00205	0.305	0.199	0.596	0.997	0.098	0.787	0.997	0	0.865	0.25
KLP00207	0.497	0.127	0.787	0.488	0.077	0.515	0.608	0.979	0.571	0.326
KLP00208	0.297	0.199	0.479	0.799	0.109	0.752	0.998	0	0.852	0.237
KLP00209	0.297	0.199	0.482	0.799	0.109	0.752	0.998	0	0.852	0.237
KLP00210	0.297	0.199	0.479	0.799	0.111	0.752	0.998	0	0.852	0.237
KLP00211	0.305	0.142	0.598	0.973	0.098	0.752	0.999	0	0.836	0.252
KLP00213	0.33	0.153	0.474	0.683	0.095	0.781	0.827	0	0.958	0.328
KLP00215	0.38	0.104	0.283	0.186	0.035	0.273	0.189	1	0.254	1
KLP00216	0.297	0.199	0.494	0.814	0.093	0.712	0.993	0	0.816	0.237
KLP00217	0.997	0.095	0.206	0.212	0.076	0.278	0.244	0	0.272	0.467
KLP00218	0.291	0.09	0.465	0.729	0.082	0.621	0.991	0	0.727	0.211
KLP00220	0.991	0.095	0.204	0.211	0.075	0.276	0.242	0	0.27	0.465
KLP00221	0.314	0.123	0.997	0.609	0.072	0.539	0.646	0.85	0.611	0.484
KLP00222	0.297	0.199	0.479	0.799	0.109	0.753	0.997	0	0.851	0.238
KLP00224	0.068	0.053	0.209	0.182	0.027	0.239	0.206	0.979	0.202	0.189
KLP00225	0.314	0.145	0.989	0.612	0.07	0.551	0.64	1	0.619	0.481
KLP00226	0.297	0.109	0.467	0.742	0.09	0.674	0.997	0	0.778	0.211
KLP00227	0.305	0.199	0.585	0.998	0.098	0.769	0.998	0	0.866	0.251
KLP00228	0.469	0.145	0.768	0.647	0.06	0.661	0.74	1	0.694	0.598
KLP00229	0.295	0.199	0.51	0.798	0.093	0.733	0.996	0.979	0.837	0.236
KLP00230	0.996	0.095	0.206	0.212	0.076	0.278	0.244	0	0.272	0.467
KLP00232	0.295	0.199	0.511	0.798	0.093	0.735	0.996	0.979	0.837	0.237
KLP00234	0.973	0.095	0.203	0.212	0.078	0.283	0.243	0	0.273	0.439
KLP00235	0.291	0.193	0.473	0.79	0.107	0.739	0.992	0	0.839	0.232
KLP00236	0.314	0.187	0.541	0.908	0.108	0.729	0.967	0	0.814	0.356
KLP00240	0.288	0.194	0.56	0.954	0.111	0.758	0.979	0	0.857	0.236
SER00057	0.032	0.028	0.072	0.04	0.016	0.06	0.027	0.979	0.053	0.013
SER00066	0.303	0.122	0.462	0.675	0.091	0.788	0.825	0	0.957	0.304
